# Supplementary material for: Integration of p16/HPV DNA Status with a 24-miRNA-Defined Molecular Phenotype Improves Clinically Relevant Stratification of Head and Neck Cancer Patients
Source: MDPI journal article supplement (doi:10.3390/cancers14153745), 2022-07-31

# Supplementary Materials

## Supplementary Tables

### Supplementary Table S1

Differentially expressed miRNAs (n = 55; FDR adjusted  $p$ -value < 0.05 and  $|\log_2$  fold change| > 0.5) in HPV-positive (n = 61) versus HPV-negative (n = 168) HNSCC. \*HPV association in HNSCC published before.

| miRNA             | log2 fold change | $p$ -value  | Adjusted $p$ -value | literature |
|-------------------|------------------|-------------|---------------------|------------|
| hsa-miR-663b      | -0.972832246     | 5.40377E-11 | 5.57129E-08         |            |
| hsa-miR-155-5p    | 0.762530316      | 2.72575E-07 | 0.000140512         | *          |
| hsa-miR-127-3p    | -0.719700868     | 1.21782E-06 | 0.000418525         | *          |
| hsa-miR-376c-3p   | -0.682914513     | 4.13084E-06 | 0.001014637         |            |
| hsa-miR-376a-3p   | -0.673742353     | 5.54998E-06 | 0.001014637         |            |
| hsa-miR-663a      | -0.671803104     | 5.90477E-06 | 0.001014637         |            |
| hsa-miR-92b-3p    | 0.649644478      | 1.18479E-05 | 0.001721624         |            |
| hsa-miR-193b-3p   | -0.645349785     | 1.35264E-05 | 0.001721624         | *          |
| hsa-miR-3135b     | 0.639594891      | 1.61339E-05 | 0.001721624         |            |
| hsa-miR-492       | 0.638466326      | 1.66986E-05 | 0.001721624         |            |
| hsa-miR-214-3p    | -0.624889506     | 2.5149E-05  | 0.002268273         |            |
| hsa-miR-934       | -0.623260986     | 2.64008E-05 | 0.002268273         |            |
| hsa-miR-381-3p    | -0.613610193     | 3.51251E-05 | 0.00271845          | *          |
| hsa-miR-3132      | -0.611917078     | 3.6914E-05  | 0.00271845          |            |
| hsa-miR-205-3p    | 0.609309853      | 3.98387E-05 | 0.002726837         |            |
| hsa-miR-564       | -0.606940071     | 4.26867E-05 | 0.002726837         |            |
| hsa-miR-1260b     | -0.603159078     | 4.76342E-05 | 0.002726837         |            |
| hsa-miR-4632-5p   | -0.602291355     | 4.88439E-05 | 0.002726837         |            |
| hsa-miR-455-3p    | -0.599781288     | 5.25095E-05 | 0.002726837         | *          |
| hsa-miR-3934-3p   | -0.599525779     | 5.28969E-05 | 0.002726837         |            |
| hsa-miR-142-5p    | 0.59726996       | 5.64368E-05 | 0.002770779         | *          |
| hsa-miR-6763-5p   | -0.592930186     | 6.38872E-05 | 0.002977638         |            |
| hsa-miR-5587-5p   | -0.590686461     | 6.80952E-05 | 0.002977638         |            |
| hsa-miR-645       | -0.58950462      | 7.04158E-05 | 0.002977638         |            |
| hsa-miR-3196      | -0.588619487     | 7.22027E-05 | 0.002977638         |            |
| hsa-miR-1909-5p   | 0.586277731      | 7.71391E-05 | 0.00305886          |            |
| hsa-miR-99b-5p    | -0.584504698     | 8.10871E-05 | 0.003096325         | *          |
| hsa-miR-6877-3p   | 0.582690334      | 8.53244E-05 | 0.003141765         |            |
| hsa-miR-874-3p    | -0.578151747     | 9.68586E-05 | 0.003443491         |            |
| hsa-miR-361-3p    | 0.575337657      | 0.000104734 | 0.003599348         |            |
| hsa-miR-378d      | 0.574083127      | 0.000108436 | 0.003606365         |            |
| hsa-miR-648       | -0.567958586     | 0.000128351 | 0.004135304         |            |
| hsa-miR-6791-5p   | -0.562052574     | 0.000150781 | 0.004494932         |            |
| hsa-miR-4436b-5p  | 0.562041677      | 0.000150825 | 0.004494932         |            |
| hsa-miR-378a-3p   | 0.560887479      | 0.000155621 | 0.004494932         | *          |
| hsa-miR-3620-3p   | 0.559854013      | 0.000160036 | 0.004494932         |            |
| hsa-miR-3200-5p   | -0.559560321     | 0.000161312 | 0.004494932         |            |
| hsa-miR-146a-5p   | 0.54961197       | 0.000210642 | 0.005709838         | *          |
| hsa-miR-3622b-5p  | -0.548669336     | 0.000215988 | 0.005709838         |            |
| hsa-miR-206       | -0.546023618     | 0.00023168  | 0.005971558         |            |
| hsa-miR-150-5p    | 0.539785988      | 0.000273013 | 0.006865269         | *          |
| hsa-miR-6507-5p   | -0.53822334      | 0.0002844   | 0.006902366         |            |
| hsa-miR-708-5p    | -0.537757779     | 0.000287878 | 0.006902366         |            |
| hsa-miR-3653-3p   | 0.534720892      | 0.000311559 | 0.007300391         |            |
| hsa-miR-6830-5p   | -0.530135067     | 0.000350798 | 0.008037173         |            |
| hsa-miR-2277-3p   | 0.523910129      | 0.000411491 | 0.009222767         |            |
| hsa-miR-3689f     | -0.521463089     | 0.000437931 | 0.009606534         |            |
| hsa-miR-195-3p    | 0.514564051      | 0.000521262 | 0.010914483         | *          |
| hsa-miR-4695-5p   | -0.514530998     | 0.000521695 | 0.010914483         |            |
| hsa-miR-6829-5p   | -0.513952939     | 0.000529315 | 0.010914483         |            |
| hsa-miR-1185-1-3p | -0.508571773     | 0.000605403 | 0.012238646         |            |
| hsa-miR-145-5p    | -0.507197769     | 0.000626401 | 0.012419604         | *          |
| hsa-miR-1208      | -0.505249037     | 0.000657345 | 0.012787229         |            |
| hsa-miR-614       | -0.502834701     | 0.000697655 | 0.013320035         |            |
| hsa-miR-6126      | -0.501412255     | 0.000722467 | 0.013542968         |            |

## Supplementary Table S2

### 24 signature miRNAs with model coefficients

| miRNA           | model coefficient |
|-----------------|-------------------|
| hsa-miR-663b    | 1.308121239       |
| hsa-miR-1238-3p | 0.835272594       |
| hsa-miR-1246    | 0.724306076       |
| hsa-miR-3174    | 0.514668701       |
| hsa-miR-18a-5p  | 0.463953711       |
| hsa-miR-96-5p   | 0.441121083       |
| hsa-miR-152-3p  | 0.411084373       |
| hsa-miR-181a-5p | 0.26391495        |
| hsa-miR-455-3p  | 0.222267731       |
| hsa-miR-7851-3p | 0.19008692        |
| hsa-miR-1234-3p | 0.137228246       |
| hsa-miR-3132    | 0.116679027       |
| hsa-miR-7-5p    | 0.096718214       |
| hsa-miR-501-3p  | 0.087255656       |
| hsa-miR-8071    | 0.042703364       |
| hsa-miR-6746-5p | -0.181571535      |
| hsa-miR-654-5p  | -0.256513707      |
| hsa-miR-378a-3p | -0.312449364      |
| hsa-miR-6763-5p | -0.399115225      |
| hsa-miR-3135b   | -0.482922457      |
| hsa-miR-92b-3p  | -0.551388586      |
| hsa-miR-155-5p  | -0.559364753      |
| hsa-miR-492     | -0.897070347      |
| hsa-miR-205-3p  | -1.163273803      |

## Supplementary Table S3

DKTK-ROG cohort – HPV status (p16/HPV DNA, E6/E7 RNA) and 24miRNA prediction

| Patient ID | p16/HPV DNA | HPV_E6_E7 | HPV16_E6      | HPV16_E7      | 24miRNA<br>predicted<br>status | 24miRNA<br>prediction<br>score |
|------------|-------------|-----------|---------------|---------------|--------------------------------|--------------------------------|
| DKTKRO_114 | pos         | pos       | expressed     | expressed     | pos                            | 0.995000332                    |
| DKTKRO_87  | pos         | pos       | expressed     | expressed     | pos                            | 0.993958921                    |
| DKTKRO_100 | pos         | pos       | expressed     | expressed     | pos                            | 0.991786263                    |
| DKTKRO_102 | pos         | pos       | expressed     | expressed     | pos                            | 0.985265481                    |
| DKTKRO_113 | pos         | pos       | expressed     | expressed     | pos                            | 0.969770965                    |
| DKTKRO_109 | pos         | pos       | expressed     | expressed     | pos                            | 0.947392242                    |
| DKTKRO_118 | pos         | pos       | expressed     | expressed     | pos                            | 0.946842792                    |
| DKTKRO_124 | pos         | pos       | expressed     | expressed     | pos                            | 0.945148671                    |
| DKTKRO_108 | pos         | pos       | expressed     | expressed     | pos                            | 0.923011919                    |
| DKTKRO_123 | pos         | pos       | expressed     | expressed     | pos                            | 0.917520416                    |
| DKTKRO_39  | pos         | neg       | not_expressed | not_expressed | pos                            | 0.910511548                    |
| DKTKRO_92  | pos         | pos       | expressed     | expressed     | pos                            | 0.899740589                    |
| DKTKRO_89  | pos         | pos       | expressed     | expressed     | pos                            | 0.893047617                    |
| DKTKRO_117 | pos         | pos       | expressed     | expressed     | pos                            | 0.892687008                    |
| DKTKRO_96  | pos         | pos       | expressed     | expressed     | pos                            | 0.886615354                    |
| DKTKRO_86  | pos         | pos       | expressed     | expressed     | pos                            | 0.883425081                    |
| DKTKRO_97  | pos         | pos       | expressed     | expressed     | pos                            | 0.879398467                    |
| DKTKRO_106 | pos         | pos       | expressed     | expressed     | pos                            | 0.868768871                    |
| DKTKRO_111 | pos         | pos       | expressed     | expressed     | pos                            | 0.863697103                    |
| DKTKRO_127 | pos         | NA        | NA            | NA            | pos                            | 0.852157203                    |
| DKTKRO_88  | pos         | pos       | expressed     | expressed     | pos                            | 0.833737603                    |
| DKTKRO_99  | pos         | pos       | expressed     | expressed     | pos                            | 0.820295535                    |
| DKTKRO_126 | pos         | pos       | expressed     | expressed     | pos                            | 0.816785505                    |
| DKTKRO_95  | pos         | pos       | expressed     | expressed     | pos                            | 0.815048166                    |
| DKTKRO_105 | pos         | pos       | expressed     | expressed     | pos                            | 0.7883644                      |
| DKTKRO_125 | pos         | NA        | NA            | NA            | pos                            | 0.780614359                    |
| DKTKRO_112 | pos         | pos       | expressed     | expressed     | pos                            | 0.758567651                    |
| DKTKRO_104 | pos         | pos       | expressed     | expressed     | pos                            | 0.754003514                    |
| DKTKRO_101 | pos         | pos       | expressed     | expressed     | pos                            | 0.743742505                    |
| DKTKRO_120 | pos         | pos       | expressed     | expressed     | pos                            | 0.702105155                    |
| DKTKRO_93  | pos         | pos       | expressed     | expressed     | pos                            | 0.697976222                    |
| DKTKRO_122 | pos         | pos       | expressed     | expressed     | pos                            | 0.653592753                    |
| DKTKRO_82  | neg         | pos       | expressed     | expressed     | pos                            | 0.564083323                    |
| DKTKRO_76  | neg         | neg       | not_expressed | not_expressed | pos                            | 0.555125247                    |
| DKTKRO_110 | pos         | pos       | expressed     | expressed     | pos                            | 0.527667587                    |
| DKTKRO_04  | neg         | NA        | NA            | NA            | pos                            | 0.519804714                    |
| DKTKRO_98  | pos         | pos       | expressed     | expressed     | pos                            | 0.507927192                    |
| DKTKRO_84  | neg         | pos       | expressed     | expressed     | neg                            | 0.496458659                    |
| DKTKRO_91  | pos         | neg       | not_expressed | not_expressed | neg                            | 0.493963947                    |
| DKTKRO_107 | pos         | neg       | not_expressed | not_expressed | neg                            | 0.437042447                    |
| DKTKRO_94  | pos         | neg       | not_expressed | not_expressed | neg                            | 0.43643643                     |
| DKTKRO_06  | neg         | neg       | not_expressed | not_expressed | neg                            | 0.388811822                    |
| DKTKRO_121 | pos         | pos       | expressed     | expressed     | neg                            | 0.384918478                    |
| DKTKRO_33  | neg         | neg       | not_expressed | not_expressed | neg                            | 0.360544389                    |
| DKTKRO_23  | neg         | neg       | not_expressed | not_expressed | neg                            | 0.349532466                    |
| DKTKRO_25  | neg         | neg       | not_expressed | not_expressed | neg                            | 0.323130394                    |
| DKTKRO_29  | neg         | neg       | not_expressed | not_expressed | neg                            | 0.289341391                    |
| DKTKRO_81  | neg         | neg       | not_expressed | not_expressed | neg                            | 0.194636203                    |
| DKTKRO_19  | neg         | neg       | not_expressed | not_expressed | neg                            | 0.16841202                     |
| DKTKRO_37  | neg         | neg       | not_expressed | not_expressed | neg                            | 0.157300928                    |
| DKTKRO_24  | neg         | neg       | not_expressed | not_expressed | neg                            | 0.14388572                     |
| DKTKRO_28  | neg         | neg       | not_expressed | not_expressed | neg                            | 0.139872487                    |

| Patient ID | p16/HPV DNA | HPV_E6_E7 | HPV16_E6      | HPV16_E7      | 24miRNA<br>predicted<br>status | 24miRNA<br>prediction<br>score |
|------------|-------------|-----------|---------------|---------------|--------------------------------|--------------------------------|
| DKTKRO_69  | neg         | neg       | not_expressed | not_expressed | neg                            | 0.133894951                    |
| DKTKRO_40  | neg         | neg       | not_expressed | not_expressed | neg                            | 0.128646922                    |
| DKTKRO_11  | neg         | neg       | not_expressed | not_expressed | neg                            | 0.116570486                    |
| DKTKRO_75  | neg         | neg       | not_expressed | not_expressed | neg                            | 0.112820847                    |
| DKTKRO_48  | neg         | neg       | not_expressed | not_expressed | neg                            | 0.112053879                    |
| DKTKRO_45  | neg         | neg       | not_expressed | not_expressed | neg                            | 0.107490336                    |
| DKTKRO_66  | neg         | neg       | not_expressed | not_expressed | neg                            | 0.095951434                    |
| DKTKRO_03  | neg         | neg       | not_expressed | not_expressed | neg                            | 0.091153084                    |
| DKTKRO_62  | neg         | neg       | not_expressed | not_expressed | neg                            | 0.087728739                    |
| DKTKRO_30  | neg         | neg       | not_expressed | not_expressed | neg                            | 0.08618827                     |
| DKTKRO_115 | neg         | neg       | not_expressed | not_expressed | neg                            | 0.082725128                    |
| DKTKRO_70  | neg         | neg       | not_expressed | not_expressed | neg                            | 0.079399933                    |
| DKTKRO_52  | neg         | NA        | NA            | NA            | neg                            | 0.076532533                    |
| DKTKRO_59  | neg         | neg       | not_expressed | not_expressed | neg                            | 0.076249225                    |
| DKTKRO_73  | neg         | neg       | not_expressed | not_expressed | neg                            | 0.073600479                    |
| DKTKRO_13  | neg         | NA        | NA            | NA            | neg                            | 0.071980427                    |
| DKTKRO_63  | neg         | pos       | expressed     | expressed     | neg                            | 0.070415836                    |
| DKTKRO_85  | neg         | neg       | not_expressed | not_expressed | neg                            | 0.067884255                    |
| DKTKRO_42  | neg         | neg       | not_expressed | not_expressed | neg                            | 0.067682988                    |
| DKTKRO_41  | neg         | neg       | not_expressed | not_expressed | neg                            | 0.064656374                    |
| DKTKRO_21  | neg         | neg       | not_expressed | not_expressed | neg                            | 0.06053441                     |
| DKTKRO_58  | neg         | pos       | expressed     | expressed     | neg                            | 0.058669967                    |
| DKTKRO_16  | neg         | neg       | not_expressed | not_expressed | neg                            | 0.058571273                    |
| DKTKRO_119 | neg         | neg       | not_expressed | not_expressed | neg                            | 0.05368363                     |
| DKTKRO_07  | neg         | neg       | not_expressed | not_expressed | neg                            | 0.052046937                    |
| DKTKRO_71  | neg         | neg       | not_expressed | not_expressed | neg                            | 0.052037628                    |
| DKTKRO_27  | neg         | neg       | expressed     | not_expressed | neg                            | 0.048294101                    |
| DKTKRO_14  | neg         | neg       | not_expressed | not_expressed | neg                            | 0.045984534                    |
| DKTKRO_12  | neg         | neg       | not_expressed | not_expressed | neg                            | 0.045701369                    |
| DKTKRO_36  | neg         | neg       | not_expressed | not_expressed | neg                            | 0.041057448                    |
| DKTKRO_60  | neg         | neg       | not_expressed | not_expressed | neg                            | 0.037965256                    |
| DKTKRO_18  | neg         | neg       | not_expressed | not_expressed | neg                            | 0.036653174                    |
| DKTKRO_22  | neg         | neg       | not_expressed | not_expressed | neg                            | 0.034317007                    |
| DKTKRO_15  | neg         | neg       | not_expressed | not_expressed | neg                            | 0.032062969                    |
| DKTKRO_53  | neg         | neg       | not_expressed | not_expressed | neg                            | 0.031764482                    |
| DKTKRO_55  | neg         | neg       | not_expressed | not_expressed | neg                            | 0.03153084                     |
| DKTKRO_79  | neg         | neg       | not_expressed | not_expressed | neg                            | 0.028872928                    |
| DKTKRO_09  | neg         | neg       | not_expressed | not_expressed | neg                            | 0.028799191                    |
| DKTKRO_68  | neg         | neg       | not_expressed | not_expressed | neg                            | 0.028497304                    |
| DKTKRO_51  | neg         | neg       | not_expressed | not_expressed | neg                            | 0.025225501                    |
| DKTKRO_10  | neg         | neg       | not_expressed | not_expressed | neg                            | 0.023363856                    |
| DKTKRO_80  | neg         | neg       | not_expressed | not_expressed | neg                            | 0.020575474                    |
| DKTKRO_02  | neg         | neg       | not_expressed | not_expressed | neg                            | 0.020538643                    |
| DKTKRO_26  | neg         | neg       | not_expressed | not_expressed | neg                            | 0.020002642                    |
| DKTKRO_31  | neg         | neg       | not_expressed | not_expressed | neg                            | 0.018914729                    |
| DKTKRO_67  | neg         | neg       | not_expressed | not_expressed | neg                            | 0.018303998                    |
| DKTKRO_49  | neg         | neg       | not_expressed | not_expressed | neg                            | 0.01733657                     |
| DKTKRO_08  | neg         | neg       | not_expressed | not_expressed | neg                            | 0.01725853                     |
| DKTKRO_32  | neg         | neg       | not_expressed | not_expressed | neg                            | 0.014107066                    |
| DKTKRO_61  | neg         | neg       | not_expressed | not_expressed | neg                            | 0.013992524                    |
| DKTKRO_47  | neg         | neg       | not_expressed | not_expressed | neg                            | 0.013250497                    |
| DKTKRO_90  | neg         | neg       | not_expressed | not_expressed | neg                            | 0.013084948                    |
| DKTKRO_64  | neg         | neg       | not_expressed | not_expressed | neg                            | 0.011994446                    |
| DKTKRO_54  | neg         | neg       | not_expressed | not_expressed | neg                            | 0.011208931                    |
| DKTKRO_77  | neg         | neg       | not_expressed | not_expressed | neg                            | 0.010024381                    |
| DKTKRO_103 | neg         | neg       | not_expressed | not_expressed | neg                            | 0.009401474                    |
| DKTKRO_56  | neg         | neg       | not_expressed | not_expressed | neg                            | 0.009234862                    |

| Patient ID | p16/HPV DNA | HPV_E6_E7 | HPV16_E6      | HPV16_E7      | 24miRNA<br>predicted<br>status | 24miRNA<br>prediction<br>score |
|------------|-------------|-----------|---------------|---------------|--------------------------------|--------------------------------|
| DKTKRO_20  | neg         | neg       | not_expressed | not_expressed | neg                            | 0.008967031                    |
| DKTKRO_01  | neg         | NA        | NA            | NA            | neg                            | 0.006171787                    |
| DKTKRO_17  | neg         | neg       | not_expressed | not_expressed | neg                            | 0.005975247                    |
| DKTKRO_46  | neg         | neg       | not_expressed | not_expressed | neg                            | 0.005184063                    |
| DKTKRO_57  | neg         | neg       | not_expressed | not_expressed | neg                            | 0.005141149                    |
| DKTKRO_78  | neg         | neg       | not_expressed | not_expressed | neg                            | 0.004702338                    |
| DKTKRO_72  | neg         | neg       | not_expressed | not_expressed | neg                            | 0.003866234                    |
| DKTKRO_35  | neg         | neg       | not_expressed | not_expressed | neg                            | 0.003494346                    |
| DKTKRO_05  | neg         | neg       | not_expressed | not_expressed | neg                            | 0.001617284                    |
| DKTKRO_83  | neg         | neg       | not_expressed | not_expressed | neg                            | 0.001540779                    |
| DKTKRO_50  | neg         | neg       | not_expressed | not_expressed | neg                            | 0.001127026                    |
| DKTKRO_38  | neg         | neg       | not_expressed | not_expressed | neg                            | 0.001118476                    |
| DKTKRO_65  | neg         | neg       | not_expressed | not_expressed | neg                            | 0.000684314                    |
| DKTKRO_116 | neg         | neg       | not_expressed | not_expressed | neg                            | 0.00063423                     |
| DKTKRO_128 | neg         | neg       | not_expressed | not_expressed | neg                            | 0.000553778                    |
| DKTKRO_43  | neg         | neg       | not_expressed | not_expressed | neg                            | 0.000524951                    |
| DKTKRO_44  | neg         | neg       | not_expressed | not_expressed | neg                            | 0.000434844                    |
| DKTKRO_34  | neg         | neg       | not_expressed | not_expressed | neg                            | 7.80383E-05                    |
| DKTKRO_74  | neg         | neg       | not_expressed | not_expressed | neg                            | 4.06333E-05                    |

neg: negative, pos: positive; NA: not available

## Supplementary Table S4

### LMU-KKG cohort – HPV status (p16/HPV DNA, E6/E7 RNA) and 24miRNA prediction

| Patient ID | p16/HPV DNA | HPV_E6_E7 | HPV16_E6      | HPV16_E7      | HPV33_E6      | HPV33_E7      | HPV68_E6      | HPV68_E7      | 24miRNA predicted status | 24miRNA prediction score | RNA-seq 15 vs. 15 |
|------------|-------------|-----------|---------------|---------------|---------------|---------------|---------------|---------------|--------------------------|--------------------------|-------------------|
| KKG_94     | pos         | pos       | expressed     | expressed     | not_expressed | not_expressed | not_expressed | not_expressed | pos                      | 0.998828954              | yes               |
| KKG_86     | pos         | pos       | expressed     | expressed     | not_expressed | not_expressed | not_expressed | not_expressed | pos                      | 0.998050453              | yes               |
| KKG_43     | pos         | pos       | expressed     | expressed     | not_expressed | not_expressed | not_expressed | not_expressed | pos                      | 0.99790066               | yes               |
| KKG_101    | pos         | pos       | expressed     | expressed     | not_expressed | not_expressed | not_expressed | not_expressed | pos                      | 0.99742662               | yes               |
| KKG_25     | neg         | neg       | not_expressed | not_expressed | not_expressed | not_expressed | not_expressed | not_expressed | pos                      | 0.996010771              | no                |
| KKG_81     | pos         | pos       | expressed     | expressed     | not_expressed | not_expressed | not_expressed | not_expressed | pos                      | 0.992230487              | yes               |
| KKG_95     | pos         | pos       | expressed     | expressed     | not_expressed | not_expressed | not_expressed | not_expressed | pos                      | 0.988573297              | yes               |
| KKG_88     | pos         | pos       | expressed     | expressed     | not_expressed | not_expressed | not_expressed | not_expressed | pos                      | 0.987123868              | yes               |
| KKG_85     | pos         | pos       | expressed     | expressed     | not_expressed | not_expressed | not_expressed | not_expressed | pos                      | 0.970871645              | yes               |
| KKG_80     | pos         | pos       | expressed     | expressed     | not_expressed | not_expressed | not_expressed | not_expressed | pos                      | 0.95048756               | yes               |
| KKG_84     | neg         | NA        | NA            | NA            | NA            | NA            | NA            | NA            | pos                      | 0.947512459              | no                |
| KKG_96     | pos         | pos       | expressed     | expressed     | not_expressed | not_expressed | not_expressed | not_expressed | pos                      | 0.924990623              | yes               |
| KKG_102    | pos         | pos       | expressed     | expressed     | not_expressed | not_expressed | not_expressed | not_expressed | pos                      | 0.912188268              | yes               |
| KKG_79     | neg         | NA        | NA            | NA            | NA            | NA            | NA            | NA            | pos                      | 0.89441633               | no                |
| KKG_99     | pos         | pos       | expressed     | expressed     | not_expressed | not_expressed | not_expressed | not_expressed | pos                      | 0.829167689              | yes               |
| KKG_10     | neg         | NA        | NA            | NA            | NA            | NA            | NA            | NA            | pos                      | 0.812848291              | no                |
| KKG_87     | pos         | NA        | NA            | NA            | NA            | NA            | NA            | NA            | pos                      | 0.778897582              | no                |
| KKG_93     | neg         | NA        | NA            | NA            | NA            | NA            | NA            | NA            | pos                      | 0.750159014              | no                |
| KKG_82     | pos         | pos       | expressed     | expressed     | not_expressed | not_expressed | not_expressed | not_expressed | pos                      | 0.728717475              | yes               |
| KKG_83     | pos         | NA        | NA            | NA            | NA            | NA            | NA            | NA            | pos                      | 0.71560008               | no                |
| KKG_98     | pos         | pos       | expressed     | expressed     | not_expressed | not_expressed | not_expressed | not_expressed | pos                      | 0.679467717              | yes               |
| KKG_41     | neg         | neg       | not_expressed | not_expressed | not_expressed | not_expressed | not_expressed | not_expressed | pos                      | 0.652572374              | no                |
| KKG_89     | pos         | pos       | expressed     | expressed     | not_expressed | not_expressed | not_expressed | not_expressed | pos                      | 0.641811068              | yes               |
| KKG_60     | neg         | NA        | NA            | NA            | NA            | NA            | NA            | NA            | pos                      | 0.578059265              | no                |
| KKG_65     | neg         | NA        | NA            | NA            | NA            | NA            | NA            | NA            | pos                      | 0.549643828              | no                |
| KKG_76     | neg         | NA        | NA            | NA            | NA            | NA            | NA            | NA            | neg                      | 0.497614646              | no                |
| KKG_56     | neg         | neg       | not_expressed | not_expressed | not_expressed | not_expressed | not_expressed | not_expressed | neg                      | 0.496136096              | no                |
| KKG_66     | neg         | NA        | NA            | NA            | NA            | NA            | NA            | NA            | neg                      | 0.495113956              | no                |
| KKG_72     | neg         | neg       | not_expressed | not_expressed | not_expressed | not_expressed | not_expressed | not_expressed | neg                      | 0.482380635              | no                |
| KKG_27     | neg         | neg       | not_expressed | not_expressed | not_expressed | not_expressed | not_expressed | not_expressed | neg                      | 0.473684106              | no                |
| KKG_14     | neg         | neg       | not_expressed | not_expressed | not_expressed | not_expressed | not_expressed | not_expressed | neg                      | 0.471451225              | no                |
| KKG_45     | neg         | NA        | NA            | NA            | NA            | NA            | NA            | NA            | neg                      | 0.458074555              | no                |
| KKG_16     | neg         | neg       | not_expressed | not_expressed | not_expressed | not_expressed | not_expressed | not_expressed | neg                      | 0.45733692               | no                |
| KKG_09     | neg         | neg       | not_expressed | not_expressed | not_expressed | not_expressed | not_expressed | not_expressed | neg                      | 0.453211696              | no                |
| KKG_91     | pos         | pos       | expressed     | expressed     | not_expressed | not_expressed | not_expressed | not_expressed | neg                      | 0.434138644              | no                |
| KKG_100    | neg         | neg       | not_expressed | not_expressed | not_expressed | not_expressed | not_expressed | not_expressed | neg                      | 0.343888489              | no                |
| KKG_30     | neg         | neg       | not_expressed | not_expressed | not_expressed | not_expressed | not_expressed | not_expressed | neg                      | 0.307785559              | no                |
| KKG_08     | pos         | pos       | expressed     | expressed     | not_expressed | not_expressed | not_expressed | not_expressed | neg                      | 0.300908027              | no                |
| KKG_77     | neg         | neg       | not_expressed | not_expressed | not_expressed | not_expressed | not_expressed | not_expressed | neg                      | 0.285907914              | no                |
| KKG_64     | neg         | NA        | NA            | NA            | NA            | NA            | NA            | NA            | neg                      | 0.24071225               | no                |
| KKG_35     | neg         | neg       | not_expressed | not_expressed | not_expressed | not_expressed | not_expressed | not_expressed | neg                      | 0.225909002              | no                |
| KKG_39     | neg         | neg       | not_expressed | not_expressed | not_expressed | not_expressed | not_expressed | not_expressed | neg                      | 0.210254753              | no                |
| KKG_02     | neg         | neg       | not_expressed | not_expressed | not_expressed | not_expressed | not_expressed | not_expressed | neg                      | 0.206335833              | no                |
| KKG_28     | neg         | neg       | not_expressed | not_expressed | not_expressed | not_expressed | not_expressed | not_expressed | neg                      | 0.182803191              | no                |
| KKG_59     | neg         | neg       | not_expressed | not_expressed | not_expressed | not_expressed | not_expressed | not_expressed | neg                      | 0.172184808              | no                |
| KKG_75     | pos         | pos       | expressed     | expressed     | not_expressed | not_expressed | not_expressed | not_expressed | neg                      | 0.154130308              | no                |
| KKG_55     | neg         | neg       | not_expressed | not_expressed | not_expressed | not_expressed | not_expressed | not_expressed | neg                      | 0.153640925              | no                |
| KKG_97     | pos         | NA        | NA            | NA            | NA            | NA            | NA            | NA            | neg                      | 0.135407008              | no                |
| KKG_03     | neg         | neg       | not_expressed | not_expressed | not_expressed | not_expressed | not_expressed | not_expressed | neg                      | 0.132807522              | no                |
| KKG_74     | neg         | NA        | NA            | NA            | NA            | NA            | NA            | NA            | neg                      | 0.132765581              | no                |
| KKG_58     | neg         | NA        | NA            | NA            | NA            | NA            | NA            | NA            | neg                      | 0.130916432              | no                |
| KKG_47     | neg         | neg       | not_expressed | not_expressed | not_expressed | not_expressed | not_expressed | not_expressed | neg                      | 0.121840941              | no                |
| KKG_68     | neg         | neg       | not_expressed | not_expressed | not_expressed | not_expressed | not_expressed | not_expressed | neg                      | 0.089095547              | no                |
| KKG_12     | neg         | neg       | not_expressed | not_expressed | not_expressed | not_expressed | not_expressed | not_expressed | neg                      | 0.085149775              | no                |
| KKG_06     | neg         | neg       | not_expressed | not_expressed | not_expressed | not_expressed | not_expressed | not_expressed | neg                      | 0.084875255              | no                |
| KKG_15     | neg         | neg       | not_expressed | not_expressed | not_expressed | not_expressed | not_expressed | not_expressed | neg                      | 0.081273964              | no                |
| KKG_67     | neg         | neg       | not_expressed | not_expressed | not_expressed | not_expressed | not_expressed | not_expressed | neg                      | 0.078243887              | no                |
| KKG_49     | neg         | neg       | not_expressed | not_expressed | not_expressed | not_expressed | not_expressed | not_expressed | neg                      | 0.060550276              | no                |
| KKG_07     | neg         | NA        | NA            | NA            | NA            | NA            | NA            | NA            | neg                      | 0.055585532              | no                |
| KKG_29     | neg         | neg       | not_expressed | not_expressed | not_expressed | not_expressed | not_expressed | not_expressed | neg                      | 0.049429339              | no                |
| KKG_63     | neg         | neg       | not_expressed | not_expressed | not_expressed | not_expressed | not_expressed | not_expressed | neg                      | 0.043172047              | no                |
| KKG_11     | neg         | neg       | not_expressed | not_expressed | not_expressed | not_expressed | not_expressed | not_expressed | neg                      | 0.042604557              | no                |
| KKG_57     | neg         | NA        | NA            | NA            | NA            | NA            | NA            | NA            | neg                      | 0.030457999              | no                |
| KKG_61     | neg         | NA        | NA            | NA            | NA            | NA            | NA            | NA            | neg                      | 0.029691588              | no                |
| KKG_31     | neg         | neg       | not_expressed | not_expressed | not_expressed | not_expressed | not_expressed | not_expressed | neg                      | 0.026478785              | no                |
| KKG_32     | neg         | neg       | not_expressed | not_expressed | not_expressed | not_expressed | not_expressed | not_expressed | neg                      | 0.019117256              | no                |
| KKG_46     | neg         | neg       | not_expressed | not_expressed | not_expressed | not_expressed | not_expressed | not_expressed | neg                      | 0.015112011              | no                |

| Patient ID | p16/HPV DNA | HPV_E6_E7 | HPV16_E6      | HPV16_E7      | HPV33_E6      | HPV33_E7      | HPV68_E6      | HPV68_E7      | 24miRNA predicted status | 24miRNA prediction score | RNA-seq 15 vs. 15 |
|------------|-------------|-----------|---------------|---------------|---------------|---------------|---------------|---------------|--------------------------|--------------------------|-------------------|
| KKG_70     | neg         | neg       | not_expressed | not_expressed | not_expressed | not_expressed | not_expressed | not_expressed | neg                      | 0.014463434              | no                |
| KKG_05     | neg         | neg       | not_expressed | not_expressed | not_expressed | not_expressed | not_expressed | not_expressed | neg                      | 0.014128968              | no                |
| KKG_18     | neg         | neg       | not_expressed | not_expressed | not_expressed | not_expressed | not_expressed | not_expressed | neg                      | 0.014085494              | no                |
| KKG_50     | neg         | neg       | not_expressed | not_expressed | not_expressed | not_expressed | not_expressed | not_expressed | neg                      | 0.013714065              | no                |
| KKG_40     | neg         | NA        | NA            | NA            | NA            | NA            | NA            | NA            | neg                      | 0.010082555              | no                |
| KKG_78     | neg         | neg       | not_expressed | not_expressed | not_expressed | not_expressed | not_expressed | not_expressed | neg                      | 0.0082174                | no                |
| KKG_37     | neg         | NA        | NA            | NA            | NA            | NA            | NA            | NA            | neg                      | 0.007950983              | no                |
| KKG_69     | neg         | neg       | not_expressed | not_expressed | not_expressed | not_expressed | not_expressed | not_expressed | neg                      | 0.007926187              | no                |
| KKG_17     | neg         | neg       | not_expressed | not_expressed | not_expressed | not_expressed | not_expressed | not_expressed | neg                      | 0.007627718              | no                |
| KKG_01     | neg         | NA        | NA            | NA            | NA            | NA            | NA            | NA            | neg                      | 0.007527299              | no                |
| KKG_51     | neg         | neg       | not_expressed | not_expressed | not_expressed | not_expressed | not_expressed | not_expressed | neg                      | 0.007372273              | yes               |
| KKG_22     | neg         | neg       | not_expressed | not_expressed | not_expressed | not_expressed | not_expressed | not_expressed | neg                      | 0.007161392              | yes               |
| KKG_34     | neg         | NA        | NA            | NA            | NA            | NA            | NA            | NA            | neg                      | 0.007042113              | no                |
| KKG_53     | neg         | neg       | not_expressed | not_expressed | not_expressed | not_expressed | not_expressed | not_expressed | neg                      | 0.006711667              | yes               |
| KKG_13     | pos         | pos       | not_expressed | not_expressed | expressed     | expressed     | not_expressed | not_expressed | neg                      | 0.005543502              | no                |
| KKG_90     | neg         | neg       | not_expressed | not_expressed | not_expressed | not_expressed | not_expressed | not_expressed | neg                      | 0.005174718              | yes               |
| KKG_73     | neg         | neg       | not_expressed | not_expressed | not_expressed | not_expressed | not_expressed | not_expressed | neg                      | 0.004852906              | yes               |
| KKG_92     | pos         | pos       | not_expressed | not_expressed | not_expressed | not_expressed | expressed     | expressed     | neg                      | 0.004512419              | no                |
| KKG_44     | neg         | neg       | not_expressed | not_expressed | not_expressed | not_expressed | not_expressed | not_expressed | neg                      | 0.004128541              | no                |
| KKG_38     | neg         | neg       | not_expressed | not_expressed | not_expressed | not_expressed | not_expressed | not_expressed | neg                      | 0.003837574              | yes               |
| KKG_71     | neg         | NA        | NA            | NA            | NA            | NA            | NA            | NA            | neg                      | 0.003780474              | no                |
| KKG_23     | neg         | neg       | not_expressed | not_expressed | not_expressed | not_expressed | not_expressed | not_expressed | neg                      | 0.003769508              | yes               |
| KKG_04     | neg         | neg       | not_expressed | not_expressed | not_expressed | not_expressed | not_expressed | not_expressed | neg                      | 0.003673485              | yes               |
| KKG_36     | neg         | neg       | not_expressed | not_expressed | not_expressed | not_expressed | not_expressed | not_expressed | neg                      | 0.003048485              | no                |
| KKG_19     | neg         | NA        | NA            | NA            | NA            | NA            | NA            | NA            | neg                      | 0.002545168              | no                |
| KKG_54     | neg         | neg       | not_expressed | not_expressed | not_expressed | not_expressed | not_expressed | not_expressed | neg                      | 0.002431508              | yes               |
| KKG_52     | neg         | NA        | NA            | NA            | NA            | NA            | NA            | NA            | neg                      | 0.001373513              | no                |
| KKG_20     | neg         | neg       | not_expressed | not_expressed | not_expressed | not_expressed | not_expressed | not_expressed | neg                      | 0.000580384              | yes               |
| KKG_24     | neg         | neg       | not_expressed | not_expressed | not_expressed | not_expressed | not_expressed | not_expressed | neg                      | 0.000549375              | yes               |
| KKG_26     | neg         | neg       | not_expressed | not_expressed | not_expressed | not_expressed | not_expressed | not_expressed | neg                      | 0.000540793              | yes               |
| KKG_62     | neg         | neg       | not_expressed | not_expressed | not_expressed | not_expressed | not_expressed | not_expressed | neg                      | 0.000354798              | yes               |
| KKG_48     | neg         | neg       | not_expressed | not_expressed | not_expressed | not_expressed | not_expressed | not_expressed | neg                      | 0.000284391              | yes               |
| KKG_21     | neg         | NA        | NA            | NA            | NA            | NA            | NA            | NA            | neg                      | 0.000217654              | no                |
| KKG_42     | neg         | neg       | not_expressed | not_expressed | not_expressed | not_expressed | not_expressed | not_expressed | neg                      | 8.65448E-05              | yes               |

neg: negative, pos: positive; NA: not available

## Supplementary Table S5

Clinicopathological characteristics of HNSCC patient subgroups p16/HPV DNA positive and 24-miRNA signature negative (n = 10) versus p16/HPV DNA negative and 24-miRNA signature positive (n = 11)

| LMU-KKG and DKTK-ROG                 |                                                               |                                                               |
|--------------------------------------|---------------------------------------------------------------|---------------------------------------------------------------|
| Parameter                            | p16/HPV DNA positive and 24-miRNA signature negative (n = 10) | p16/HPV DNA negative and 24-miRNA signature positive (n = 11) |
| <b>Age (years)</b>                   |                                                               |                                                               |
| <45                                  | 1 (10%)                                                       | 0 (0%)                                                        |
| 45-54                                | 3 (30%)                                                       | 4 (36%)                                                       |
| 55-64                                | 2 (20%)                                                       | 4 (36%)                                                       |
| 65-74                                | 4 (40%)                                                       | 3 (27%)                                                       |
| >75                                  | 0 (0%)                                                        | 0 (0%)                                                        |
| <b>Sex</b>                           |                                                               |                                                               |
| Male                                 | 7 (70%)                                                       | 10 (91%)                                                      |
| Female                               | 3 (30%)                                                       | 1 (9%)                                                        |
| <b>Tumour localization</b>           |                                                               |                                                               |
| Hypopharynx                          | 0 (0%)                                                        | 5 (45%)                                                       |
| Oral cavity                          | 5 (50%)                                                       | 1 (9%)                                                        |
| Oropharynx                           | 5 (50%)                                                       | 5 (45%)                                                       |
| <b>UICC TNM stage</b>                |                                                               |                                                               |
| I                                    | 0 (0%)                                                        | 0 (0%)                                                        |
| II                                   | 0 (0%)                                                        | 0 (0%)                                                        |
| III                                  | 2 (20%)                                                       | 1 (9%)                                                        |
| IV                                   | 8 (80%)                                                       | 10 (91%)                                                      |
| <b>T stage</b>                       |                                                               |                                                               |
| T1                                   | 1 (10%)                                                       | 2 (18%)                                                       |
| T2                                   | 2 (10%)                                                       | 8 (73%)                                                       |
| T3                                   | 3 (10%)                                                       | 0 (0%)                                                        |
| T4                                   | 4 (10%)                                                       | 1 (9%)                                                        |
| <b>N stage</b>                       |                                                               |                                                               |
| N0                                   | 3 (30%)                                                       | 1 (9%)                                                        |
| N1                                   | 0 (0%)                                                        | 7 (64%)                                                       |
| N2                                   | 6 (60%)                                                       | 1 (9%)                                                        |
| N3                                   | 1 (10%)                                                       | 2 (18%)                                                       |
| <b>Lymphovascular invasion (LVI)</b> |                                                               |                                                               |
| 0                                    | 6 (60%)                                                       | 6 (55%)                                                       |
| 1                                    | 3 (30%)                                                       | 4 (36%)                                                       |
| Missing information                  | 1 (10%)                                                       | 1 (9%)                                                        |
| <b>Venous tumour invasion (VTI)</b>  |                                                               |                                                               |
| 0                                    | 8 (80%)                                                       | 9 (82%)                                                       |
| 1                                    | 0 (0%)                                                        | 1 (9%)                                                        |
| Missing information                  | 2 (20%)                                                       | 1 (9%)                                                        |
| <b>Perineural invasion (PNI)</b>     |                                                               |                                                               |
| 0                                    | 3 (30%)                                                       | 5 (45%)                                                       |
| 1                                    | 1 (10%)                                                       | 0 (0%)                                                        |
| Missing information                  | 6 (60%)                                                       | 6 (55%)                                                       |
| <b>Resection margin status</b>       |                                                               |                                                               |
| 0                                    | 7 (70%)                                                       | 9 (82%)                                                       |
| 1                                    | 3 (30%)                                                       | 2 (18%)                                                       |
| <b>ECE</b>                           |                                                               |                                                               |
| Not applicable (N0)                  | 3 (30%)                                                       | 1 (9%)                                                        |
| No                                   | 4 (40%)                                                       | 4 (36%)                                                       |
| Yes                                  | 3 (30%)                                                       | 6 (55%)                                                       |
| <b>Smoking status</b>                |                                                               |                                                               |
| Missing information                  | 3 (30%)                                                       | 0 (0%)                                                        |
| Nonsmoker                            | 3 (30%)                                                       | 1 (9%)                                                        |
| Smoker                               | 4 (40%)                                                       | 10 (91%)                                                      |
| <b>Simultaneous chemotherapy</b>     |                                                               |                                                               |
| Yes                                  | 8 (80%)                                                       | 9 (82%)                                                       |
| No                                   | 2 (20%)                                                       | 2 (18%)                                                       |



## Supplementary Table S6

Clinicopathological characteristics of HNSCC patients included in RNA-seq analysis: p16/HPV DNA negative and 24-miRNA signature negative (n = 15) versus p16/HPV DNA positive and 24-miRNA signature positive (n = 15) HNSCC patients.

| Parameter                            | LMU-KKG                                             |                                                     | p-value |
|--------------------------------------|-----------------------------------------------------|-----------------------------------------------------|---------|
|                                      | p16/HPV DNA negative and 24-miRNA negative (n = 15) | p16/HPV DNA positive and 24-miRNA positive (n = 15) |         |
| <b>Age (years)</b>                   |                                                     |                                                     |         |
| <45                                  | 0 (0%)                                              | 1 (4.3%)                                            |         |
| 45-54                                | 4 (27%)                                             | 2 (13%)                                             |         |
| 55-64                                | 7 (47%)                                             | 8 (53%)                                             |         |
| 65-74                                | 4 (27%)                                             | 2 (13%)                                             |         |
| >75                                  | 0 (0%)                                              | 2 (13%)                                             |         |
| <b>Sex</b>                           |                                                     |                                                     | 0.439   |
| Male                                 | 9 (60%)                                             | 11 (73%)                                            |         |
| Female                               | 6 (40%)                                             | 4 (27%)                                             |         |
| <b>Tumour localization</b>           |                                                     |                                                     |         |
| Hypopharynx                          | 1 (7%)                                              | 1 (4.3%)                                            |         |
| Oral cavity                          | 6 (40%)                                             | 0 (0.0%)                                            |         |
| Oropharynx                           | 8 (53%)                                             | 14 (93%)                                            |         |
| <b>UICC TNM stage</b>                |                                                     |                                                     | 0.827   |
| I                                    | 0 (0%)                                              | 0 (0%)                                              |         |
| II                                   | 1 (7%)                                              | 2 (13%)                                             |         |
| III                                  | 3 (20%)                                             | 3 (20%)                                             |         |
| IV                                   | 11 (73%)                                            | 10 (67%)                                            |         |
| <b>T stage</b>                       |                                                     |                                                     | 0.061   |
| T1                                   | 1 (7%)                                              | 3 (20%)                                             |         |
| T2                                   | 4 (27%)                                             | 9 (60%)                                             |         |
| T3                                   | 9 (60%)                                             | 2 (13%)                                             |         |
| T4                                   | 1 (7%)                                              | 1 (7%)                                              |         |
| <b>N stage</b>                       |                                                     |                                                     | 0.632   |
| N0                                   | 2 (13%)                                             | 4 (27%)                                             |         |
| N1                                   | 3 (20%)                                             | 2 (13%)                                             |         |
| N2                                   | 10 (67%)                                            | 9 (60%)                                             |         |
| N3                                   | 0 (0%)                                              | 0 (0%)                                              |         |
| <b>Lymphovascular invasion (LVI)</b> |                                                     |                                                     | 0.686   |
| 0                                    | 9 (60%)                                             | 10 (67%)                                            |         |
| 1                                    | 5 (33%)                                             | 4 (27%)                                             |         |
| Missing information                  | 1 (7%)                                              | 1 (7%)                                              |         |
| <b>Venous tumour invasion (VTI)</b>  |                                                     |                                                     |         |
| 0                                    | 14 (93%)                                            | 13 (87%)                                            |         |
| 1                                    | 1 (7%)                                              | 0 (0%)                                              |         |
| Missing information                  | 0 (0%)                                              | 2 (13%)                                             |         |
| <b>Perineural invasion (PNI)</b>     |                                                     |                                                     | 0.202   |
| 0                                    | 5 (33%)                                             | 9 (60%)                                             |         |
| 1                                    | 4 (27%)                                             | 2 (13%)                                             |         |
| Missing information                  | 6 (40%)                                             | 4 (27%)                                             |         |
| <b>Resection margin status</b>       |                                                     |                                                     | 0.339   |
| 0                                    | 10 (67%)                                            | 9 (60%)                                             |         |
| 1                                    | 3 (20%)                                             | 6 (40%)                                             |         |
| 2                                    | 0 (0%)                                              | 0 (0%)                                              |         |
| Missing information                  | 2 (13%)                                             | 0 (0%)                                              |         |
| <b>ECE</b>                           |                                                     |                                                     | 0.502   |
| Not applicable (N0)                  | 2 (13%)                                             | 4 (27%)                                             |         |
| No                                   | 9 (60%)                                             | 6 (40%)                                             |         |
| Yes                                  | 4 (27%)                                             | 5 (33%)                                             |         |
| Missing information                  | 0 (0%)                                              | 0 (0%)                                              |         |
| <b>Smoking status</b>                |                                                     |                                                     | 0.208   |
| Missing information                  | 1 (7%)                                              | 3 (20%)                                             |         |
| Non-smoker                           | 1 (7%)                                              | 3 (20%)                                             |         |
| Smoker                               | 13 (87%)                                            | 9 (60%)                                             |         |
| <b>Simultaneous chemotherapy</b>     |                                                     |                                                     | 0.081   |
| Yes                                  | 12 (80%)                                            | 11 (73%)                                            |         |
| No                                   | 3 (20%)                                             | 4 (27%)                                             |         |

## Supplementary Table S7

Differentially expressed genes (n = 658; FDR adjusted *p*-value < 0.1 and |log2 fold change| > 0.5) in 24-miRNA signature-positive/HPV-positive (n = 15) versus 24-miRNA signature-negative/HPV-negative (n = 15) HNSCC.

| Gene       | log2 fold change | <i>p</i> -value | adjusted <i>p</i> -value |
|------------|------------------|-----------------|--------------------------|
| ABCA13     | 2.318848715      | 0.002759711     | 0.077305173              |
| ABCA17P    | 4.400914314      | 3.72735E-11     | 3.30019E-08              |
| ACP7       | -3.132141444     | 2.96522E-05     | 0.00306464               |
| ACSS3      | -1.641096322     | 0.000651595     | 0.029952012              |
| ACTG2      | -3.069339802     | 0.000136119     | 0.009495939              |
| ACTN1      | -1.76134038      | 1.3764E-07      | 5.91185E-05              |
| ACTR3C     | 1.629309521      | 0.000220257     | 0.01530247               |
| ADAM12     | -1.707966483     | 0.000934964     | 0.037566739              |
| ADAMTS12   | -1.787349907     | 0.000537621     | 0.032988191              |
| ADAMTS15   | -3.107323631     | 3.07001E-07     | 8.03472E-05              |
| ADGRD1-AS1 | -2.98940835      | 0.00089102      | 0.035945679              |
| ADGRD2     | 2.483131478      | 0.003322524     | 0.086344137              |
| ADH6       | 1.988218818      | 0.00113814      | 0.040123043              |
| ADPRHL1    | -2.524602217     | 0.000756669     | 0.032815825              |
| AHNAK2     | -1.666423602     | 0.001746429     | 0.065005043              |
| AHR        | -1.224755917     | 0.000863797     | 0.040123043              |
| AJAP1      | -3.652214858     | 2.6415E-06      | 0.000410632              |
| AKR1C2     | -2.476258203     | 0.000778831     | 0.040089848              |
| AKR1C3     | -2.868501717     | 4.32409E-05     | 0.004571024              |
| ALDH1L2    | -1.397088147     | 0.000892756     | 0.04601446               |
| ALOX12B    | -3.231041976     | 0.000773187     | 0.030493102              |
| ALOXE3     | -4.056265755     | 7.62637E-06     | 0.000987959              |
| AMIGO2     | -1.925295448     | 0.000256119     | 0.016750889              |
| ANO1       | -2.478929079     | 2.19818E-10     | 9.16956E-07              |
| ANO1-AS1   | -2.254364137     | 0.000576258     | 0.027141098              |
| APBB2      | -1.250600077     | 0.001227278     | 0.056402003              |
| APCDD1     | -1.444209057     | 0.000883409     | 0.044667928              |
| APCDD1L-DT | -2.70393536      | 0.000263419     | 0.009435815              |
| APOD       | -2.628755142     | 0.000280309     | 0.014688242              |
| AREG       | -2.525448942     | 1.99684E-07     | 5.91185E-05              |
| ARG1       | -2.810403303     | 0.004351236     | 0.066498666              |
| ARHGAP26   | 1.861983885      | 4.07354E-06     | 0.000917294              |
| ARHGEF25   | -1.599377128     | 0.001982699     | 0.061448281              |
| ARHGEF33   | 1.562489769      | 0.001355356     | 0.030810631              |
| ARL4AP1    | 1.638880207      | 0.001820014     | 0.056363089              |
| ARMCX1     | -1.6551603       | 0.002954793     | 0.076705461              |
| ARSI       | -2.03983306      | 0.002762844     | 0.077213319              |
| ASAP3      | -1.32256061      | 0.000987777     | 0.043266035              |
| B4GALNT1   | -2.261640983     | 0.000649755     | 0.032557247              |
| B4GALNT3   | -2.077348006     | 0.000262719     | 0.025303292              |
| BAALC      | -2.114270442     | 0.000875099     | 0.035701598              |
| BARD1      | 1.369755676      | 3.53707E-05     | 0.005623442              |
| BCAT1      | -1.575777537     | 0.001510882     | 0.074359519              |
| BCHE       | -4.191899389     | 9.10484E-05     | 0.007171791              |
| BCL2       | 2.048036053      | 8.08562E-06     | 0.001413215              |
| BEND6      | -2.344301434     | 3.81005E-05     | 0.00348907               |
| BGN        | -1.77843586      | 0.000910959     | 0.045439928              |
| BLID       | -3.019612791     | 0.000732658     | 0.040967206              |
| BMPR1B     | -2.728329485     | 1.74394E-06     | 0.000377985              |
| BOC        | -1.604992552     | 0.000857675     | 0.038686519              |
| BPIFC      | -4.747165842     | 1.6533E-05      | 0.001969034              |

| Gene          | log2 fold change | p-value     | adjusted p-value |
|---------------|------------------|-------------|------------------|
| BRIP1         | 1.248904669      | 0.000735205 | 0.040123043      |
| BTN2A2        | 1.369244796      | 0.002085968 | 0.07066335       |
| C11orf87      | -3.589406762     | 0.001294361 | 0.061222665      |
| C17orf51      | -1.259083088     | 0.002787709 | 0.068058068      |
| C19orf57      | 2.343773331      | 5.739E-07   | 0.000119841      |
| C4orf19       | 1.867512111      | 0.002373463 | 0.06910106       |
| C5orf38       | -2.859686166     | 0.000881686 | 0.045004395      |
| C5orf46       | -4.127901797     | 8.19131E-07 | 0.000207308      |
| C5orf56       | 1.180194292      | 0.001013381 | 0.050330372      |
| C5orf66-AS1   | 2.700442455      | 0.002213887 | 0.079576706      |
| C6orf15       | -3.30917043      | 0.002365427 | 0.09150778       |
| CACNG8        | -3.259440875     | 0.001568853 | 0.052417656      |
| CALB2         | -4.043135044     | 1.02714E-06 | 0.000249954      |
| CALD1         | -1.514046091     | 0.00186719  | 0.068058068      |
| CALHM5        | -1.709259957     | 0.000469523 | 0.024080908      |
| CAMK2N1       | -2.042321603     | 0.000487137 | 0.027141098      |
| CAPN14        | 3.00178105       | 0.000580941 | 0.030747971      |
| CARMN         | -1.613756116     | 0.000173425 | 0.013260627      |
| CASP14        | -3.597707047     | 0.000934184 | 0.037336087      |
| CAV1          | -2.344647496     | 2.87225E-08 | 4.89038E-05      |
| CAVIN1        | -1.447744101     | 0.000253746 | 0.018774853      |
| CAVIN3        | -2.295551493     | 1.68211E-05 | 0.001182045      |
| CAVIN4        | -2.047083145     | 0.000862637 | 0.033885302      |
| CCBE1         | -2.24141961      | 0.003487923 | 0.090121806      |
| CCDC144NL-AS1 | -3.849681994     | 6.12695E-05 | 0.004571024      |
| CCDC3         | -1.889765621     | 6.07122E-05 | 0.004555475      |
| CCDC60        | 2.620094639      | 0.001929615 | 0.061222665      |
| CCDC86        | -1.434736886     | 0.000248818 | 0.015041719      |
| CCNA1         | -4.896016738     | 2.30862E-07 | 6.45873E-05      |
| CCNE2         | 1.355898538      | 0.002421691 | 0.077412466      |
| CD22          | 2.856285686      | 0.000254257 | 0.016704812      |
| CD248         | -1.801763246     | 0.000875775 | 0.035945679      |
| CD36          | -2.178108681     | 0.000136363 | 0.01059078       |
| CD48          | 1.523036169      | 0.002087165 | 0.057149213      |
| CDA           | -3.217224954     | 0.000111364 | 0.008219087      |
| CDC7          | 1.281170738      | 0.000134414 | 0.010154327      |
| CDH13         | -1.983059286     | 2.51665E-06 | 0.00050989       |
| CDH19         | -3.259465349     | 8.13798E-05 | 0.006600814      |
| CDH4          | -2.660744116     | 0.001776579 | 0.064354313      |
| CDHR1         | -2.478274539     | 4.50486E-05 | 0.004687742      |
| CDK6          | -1.619856436     | 0.00010431  | 0.009937295      |
| CDKN2A        | 2.289792215      | 0.000251567 | 0.016628226      |
| CDKN2B-AS1    | 2.576960365      | 2.9779E-08  | 9.83631E-06      |
| CDKN2C        | 2.010700216      | 1.19761E-07 | 3.89489E-05      |
| CDR2L         | -1.567612657     | 0.003100683 | 0.082615719      |
| CENPK         | 1.498762233      | 1.49056E-05 | 0.002012169      |
| CENPW         | 1.561290351      | 0.003153453 | 0.083337533      |
| CERCAM        | -1.769886113     | 0.00126896  | 0.048969226      |
| CES1          | -3.790011872     | 2.73844E-05 | 0.002916528      |
| CFP           | 1.846276516      | 0.000814955 | 0.034526881      |
| CHGB          | -3.989593283     | 5.72574E-06 | 0.00089678       |
| CIITA         | 1.260614692      | 0.003266092 | 0.086167076      |
| CLEC11A       | -2.470199472     | 0.000225785 | 0.012535413      |
| CLEC18B       | -2.81206006      | 0.000462748 | 0.028768389      |
| CLGN          | 2.814180554      | 0.002382592 | 0.044393265      |
| CLMP          | -1.612077367     | 0.001020682 | 0.044193926      |
| CLTCL1        | -1.60719308      | 0.001177628 | 0.060543191      |
| CNTN5         | -3.265822722     | 0.000753119 | 0.032148717      |
| COL12A1       | -1.76869924      | 0.000466396 | 0.027141098      |

| Gene       | log2 fold change | p-value     | adjusted p-value |
|------------|------------------|-------------|------------------|
| COL19A1    | 2.857618096      | 0.000994145 | 0.038214319      |
| COL1A1     | -1.897296667     | 0.001482517 | 0.065005043      |
| COL1A2     | -1.816844751     | 0.001378854 | 0.048955818      |
| COL25A1    | -3.682120991     | 0.000166389 | 0.013779092      |
| COL3A1     | -1.854657009     | 0.001038109 | 0.040123043      |
| COL4A4     | 2.012634466      | 0.000242937 | 0.01639756       |
| COL4A6     | -3.094759235     | 3.19365E-05 | 0.007013336      |
| COL5A1     | -2.003324642     | 8.09124E-05 | 0.008238674      |
| COL5A2     | -1.937729759     | 0.000281284 | 0.016424164      |
| COL5A3     | -1.810805719     | 0.000133624 | 0.011676298      |
| COL6A1     | -2.282525638     | 1.01299E-06 | 0.000252959      |
| COL6A2     | -2.363173363     | 7.02801E-07 | 0.000205813      |
| COL6A3     | -1.718224319     | 0.000212686 | 0.017069286      |
| COL6A4P1   | 2.069299466      | 0.000817966 | 0.031308353      |
| CORIN      | -1.791625453     | 0.000302323 | 0.016770025      |
| CORO6      | -2.943713615     | 3.02602E-06 | 0.000568527      |
| CPS1       | -2.915757709     | 0.000137376 | 0.009649897      |
| CPSF1P1    | -2.20854109      | 0.000635023 | 0.030747971      |
| CR2        | 3.959371688      | 0.001314375 | 0.046771062      |
| CREB3L1    | -1.859281274     | 0.00225441  | 0.060543191      |
| CREB5      | -1.803496463     | 0.000470205 | 0.026870065      |
| CREG2      | -3.187671987     | 5.56867E-05 | 0.004834902      |
| CRIM1      | -1.341904939     | 0.000692463 | 0.038686519      |
| CSMD3      | -4.18337472      | 0.000860028 | 0.03559425       |
| CSPG4      | -1.926359584     | 0.000106128 | 0.010067338      |
| CTTN       | -1.152924967     | 0.001675407 | 0.067611287      |
| CWH43      | -3.498160073     | 0.001473094 | 0.050170824      |
| CXCL14     | -3.143788214     | 2.14298E-10 | 2.92376E-07      |
| CXCL17     | 2.514745243      | 4.35958E-06 | 0.000584844      |
| CXCR2P1    | 1.902060743      | 0.00105123  | 0.040089848      |
| CYCSP6     | -3.923378108     | 0.001705433 | 0.068058068      |
| CYP26B1    | -1.68904805      | 0.002875471 | 0.077783207      |
| CYP4F22    | -2.885302716     | 0.001966386 | 0.061222665      |
| CYP4F30P   | -3.684847412     | 0.003946937 | 0.098077562      |
| CYP4X1     | 2.911115838      | 6.23873E-09 | 4.00995E-06      |
| CYR61      | -1.612474693     | 0.002332364 | 0.082633353      |
| DACH1      | -2.25539025      | 0.005209628 | 0.075115903      |
| DACT1      | -2.184189795     | 0.000613334 | 0.031224387      |
| DBIL5P2    | 2.543909483      | 0.000203152 | 0.011553971      |
| DCBLD1     | -1.345470838     | 0.000630897 | 0.036491196      |
| DENND2D    | 1.094096086      | 0.001102621 | 0.05084661       |
| DGKG       | -1.594122263     | 0.001205837 | 0.040089848      |
| DGKI       | -2.043594081     | 0.000138797 | 0.010735057      |
| DKK1       | -3.853248931     | 9.21571E-06 | 0.001182045      |
| DKK3       | -1.897107988     | 7.9441E-05  | 0.008219087      |
| DLX1       | -2.086445537     | 0.004250106 | 0.065228347      |
| DLX5       | -1.72067982      | 0.00208844  | 0.063603641      |
| DMKN       | -2.867880396     | 6.37306E-05 | 0.008219087      |
| DNAH17-AS1 | -2.871529125     | 0.001159292 | 0.040620958      |
| DNAJC6     | -2.440703765     | 0.001298917 | 0.046527074      |
| DNER       | -4.047716733     | 1.37713E-06 | 0.000275875      |
| DOC2B      | 1.727281391      | 0.000137684 | 0.012572584      |
| DPF1       | -2.373202578     | 0.000948723 | 0.037184952      |
| DSC1       | -6.57285926      | 1.82566E-11 | 2.692E-08        |
| DSEL       | -1.63628404      | 0.000352333 | 0.017807293      |
| DSG1       | -5.899817386     | 5.68794E-12 | 1.12209E-08      |
| DUOX2      | 1.817979528      | 0.002123049 | 0.078805664      |
| E2F8       | 1.449648896      | 0.001883757 | 0.06587777       |
| EDARADD    | 1.715852797      | 0.001021412 | 0.04386847       |

| Gene     | log2 fold change | p-value     | adjusted p-value |
|----------|------------------|-------------|------------------|
| EFEMP1   | -1.585829448     | 0.002228849 | 0.079704194      |
| EFEMP2   | -1.443358749     | 0.000383569 | 0.028200153      |
| EFNB3    | -2.790308823     | 4.45933E-05 | 0.004105959      |
| EFR3B    | -2.036052671     | 0.000274773 | 0.014452304      |
| EGFR     | -1.625643531     | 0.000752243 | 0.040765099      |
| ELF3     | 1.814954605      | 0.000741612 | 0.045868367      |
| ELFN2    | -4.39964213      | 5.23145E-06 | 0.000954801      |
| ELOA3    | 3.347691504      | 0.00401348  | 0.097787095      |
| EMC3-AS1 | 1.337494868      | 0.000712899 | 0.031288248      |
| EMILIN1  | -1.803568825     | 0.003590779 | 0.079349694      |
| EML1     | -1.577848806     | 3.58467E-05 | 0.0039522        |
| ENPEP    | -1.763537912     | 0.000170368 | 0.011283534      |
| EPGN     | -3.609433547     | 1.21829E-05 | 0.00139713       |
| ERBB4    | -2.983765655     | 0.001602274 | 0.057149213      |
| EREG     | -2.978721877     | 0.001733526 | 0.062339921      |
| EVA1A    | -3.627303287     | 1.83375E-08 | 8.37003E-06      |
| EYA2     | 2.0929699        | 0.000107554 | 0.008960683      |
| EZH2     | 1.196823013      | 0.001029566 | 0.044374578      |
| F2R      | -1.320029316     | 0.001252373 | 0.065228347      |
| F2RL1    | -2.36945314      | 2.90732E-06 | 0.001158257      |
| FABP4    | -3.86801783      | 6.65543E-05 | 0.003352763      |
| FAM111B  | 1.563299729      | 0.000162241 | 0.017284613      |
| FAM216B  | -2.249576505     | 0.000541623 | 0.026713081      |
| FAM221A  | 1.35534939       | 0.003366679 | 0.097293383      |
| FAM222A  | 1.837894227      | 0.00468761  | 0.09967129       |
| FAM25A   | -3.190925515     | 0.003968441 | 0.097685371      |
| FAM30A   | 2.083545903      | 0.000391823 | 0.026516406      |
| FAM3B    | 3.286340128      | 2.12091E-06 | 0.000391078      |
| FAM81A   | 2.394668495      | 0.000215375 | 0.013260627      |
| FAM83E   | 2.230852003      | 0.001278963 | 0.045811812      |
| FAM89A   | -1.648167267     | 6.25945E-05 | 0.005290025      |
| FAP      | -1.957135588     | 9.64312E-05 | 0.009344405      |
| FAR2P4   | -5.900514927     | 1.85944E-07 | 5.44225E-05      |
| FBN2     | -2.134654449     | 0.000893859 | 0.052362764      |
| FCRL3    | 2.064605072      | 0.003308401 | 0.086307874      |
| FERMT2   | -1.835910462     | 1.43762E-05 | 0.001969034      |
| FETUB    | -3.447191294     | 0.001826339 | 0.060233611      |
| FKBP10   | -1.78740231      | 0.000121895 | 0.009896004      |
| FKBP9    | -1.454938348     | 9.67039E-08 | 4.45881E-05      |
| FKBP9P1  | -2.677024381     | 3.26233E-06 | 0.000551416      |
| FLG2     | -3.225817532     | 0.000764006 | 0.032883485      |
| FLNC     | -2.422901314     | 0.001716534 | 0.085971602      |
| FLRT2    | -2.147949624     | 0.000198045 | 0.021150038      |
| FLRT3    | -2.207017809     | 0.002414568 | 0.077702345      |
| FN1      | -2.170042289     | 0.000145256 | 0.010117052      |
| FNDC9    | 1.671714739      | 0.001597128 | 0.034120699      |
| FOXA1    | 2.235722433      | 0.000169994 | 0.012614385      |
| FOXF2    | -1.892948427     | 2.7622E-05  | 0.002968251      |
| FOXRED2  | 1.543331539      | 1.91899E-05 | 0.002791004      |
| FRMD5    | 1.50676073       | 9.83202E-05 | 0.016095376      |
| FSTL1    | -1.501506252     | 0.000932266 | 0.045439928      |
| FSTL3    | -1.839651815     | 0.001595553 | 0.053325825      |
| FTH1P20  | -1.677141444     | 0.000848463 | 0.022242986      |
| FUT6     | 3.320609893      | 0.000189827 | 0.010563841      |
| GABRQ    | 2.487190516      | 0.000895794 | 0.03604725       |
| GALNT13  | -3.906785846     | 1.62408E-07 | 3.08235E-05      |
| GALNT6   | -2.481646745     | 1.84266E-09 | 1.36884E-06      |
| GAP43    | -3.316784312     | 0.000548529 | 0.032815825      |
| GAPDHP54 | 2.602825916      | 0.000352893 | 0.021687605      |

| Gene      | log2 fold change | p-value     | adjusted p-value |
|-----------|------------------|-------------|------------------|
| GATA4     | -4.700461369     | 0.000397679 | 0.021150038      |
| GBX1      | 4.299633731      | 0.000138681 | 0.010877455      |
| GDF15     | 2.902693772      | 0.002939325 | 0.078367308      |
| GDPD2     | -3.573609769     | 0.001874767 | 0.0608415        |
| GDPGF1    | 1.152389393      | 0.002281524 | 0.067748085      |
| GHR       | -1.684777048     | 0.001987557 | 0.062623169      |
| GINS2     | 1.670142388      | 4.26484E-05 | 0.004048936      |
| GJA1      | -2.097930432     | 6.73399E-06 | 0.00101119       |
| GJB2      | -2.323243473     | 0.000351608 | 0.024466216      |
| GJB6      | -3.08634875      | 8.18807E-05 | 0.008219087      |
| GKAP1     | 1.80114032       | 0.002385519 | 0.069290623      |
| GLI2      | -2.649655274     | 5.68714E-05 | 0.004316054      |
| GOLGA2P5  | 1.391451096      | 0.003042969 | 0.090633178      |
| GPSM1     | -1.433048787     | 0.004319488 | 0.094427136      |
| GPX2      | -2.24833116      | 0.000812012 | 0.040967206      |
| GREM1     | -2.026908712     | 2.4756E-05  | 0.003332174      |
| GSDMA     | -3.579310772     | 0.000187225 | 0.012151993      |
| HELLS     | 1.488146539      | 1.29121E-05 | 0.001601066      |
| HEPH      | -1.55779871      | 0.001733681 | 0.057528502      |
| HLF       | 1.860414467      | 0.003184112 | 0.093942359      |
| HMCN1     | -1.522695424     | 0.001750588 | 0.06910106       |
| HMGB3P8   | -4.355471502     | 4.81137E-05 | 0.005381016      |
| HMSD      | 3.71657813       | 1.40238E-08 | 6.78903E-06      |
| HOXC13    | -2.965375519     | 2.32193E-07 | 6.45873E-05      |
| HOXC13-AS | -3.246175185     | 0.000636621 | 0.038056025      |
| HS3ST4    | 5.305824488      | 8.44423E-07 | 0.000190305      |
| HSPB3     | -3.070981121     | 0.001488916 | 0.063938456      |
| HTRA1     | -1.83196013      | 0.000306764 | 0.022659441      |
| HVCN1     | 1.687472475      | 0.002493303 | 0.068288198      |
| IDO1      | 2.726856136      | 4.99121E-06 | 0.001182045      |
| IGDCC4    | -1.797304117     | 8.34631E-05 | 0.006600814      |
| IGF1      | -1.775242928     | 0.003327506 | 0.097467154      |
| IGF2BP1   | -6.31344454      | 1.22513E-07 | 5.91185E-05      |
| IGFBP6    | -3.079733131     | 9.63055E-09 | 4.963E-06        |
| IGFL2     | -4.778530307     | 7.03019E-07 | 0.000152424      |
| IGFL3     | -3.279533636     | 0.001949887 | 0.078662366      |
| IGHV1-69D | 2.748047907      | 0.001433637 | 0.06792547       |
| IGHV4-4   | 2.460425023      | 0.000331133 | 0.019006657      |
| IGKV1-33  | 3.003740351      | 0.001126256 | 0.046771062      |
| IGLV1-44  | 2.505073587      | 0.003009736 | 0.080456722      |
| IGLV3-19  | 2.527256327      | 0.002250985 | 0.067216079      |
| IGLV9-49  | 3.94697893       | 0.001967688 | 0.061222665      |
| IKZF2     | 1.409082098      | 0.000700091 | 0.031308353      |
| IKZF3     | 1.643529615      | 5.1924E-05  | 0.005740972      |
| IL1R1     | -1.342202061     | 0.000386973 | 0.026348854      |
| IL2RG     | 1.436398967      | 0.001356769 | 0.053130072      |
| INHBA     | -2.314499885     | 1.75978E-05 | 0.002655683      |
| INHBA-AS1 | -2.61508606      | 0.001156167 | 0.043326674      |
| INHBB     | -3.377751465     | 2.33215E-09 | 1.49029E-06      |
| INSYN1    | -2.098853538     | 0.003858218 | 0.095175587      |
| IRS1      | -1.489493384     | 0.001701947 | 0.070677887      |
| IRX1      | -3.573533805     | 0.001573061 | 0.079326106      |
| IRX2      | -2.582657711     | 1.12398E-06 | 0.000261885      |
| ITGA5     | -1.718456142     | 2.58547E-05 | 0.004141029      |
| ITPRID2   | -1.187958251     | 0.000591548 | 0.03559425       |
| JAKMIP3   | -2.683824004     | 0.000573803 | 0.027141098      |
| JPH2      | -3.464662857     | 3.75837E-05 | 0.003629354      |
| KANK4     | -3.0431336       | 7.27037E-05 | 0.005958183      |
| KCND2     | -2.085801526     | 0.002679586 | 0.068662491      |

| Gene       | log2 fold change | p-value     | adjusted p-value |
|------------|------------------|-------------|------------------|
| KCNIP4-IT1 | -4.613115892     | 3.00753E-05 | 0.00306464       |
| KCNJ10     | 1.84319273       | 0.001407478 | 0.048880788      |
| KCNK10     | -2.844270925     | 0.003649555 | 0.060413588      |
| KCNMB4     | -2.103853274     | 0.00058038  | 0.027141098      |
| KCNS1      | 2.394700073      | 0.000261499 | 0.01530247       |
| KIF3C      | -1.556990178     | 0.001496679 | 0.057285006      |
| KIRREL1    | -1.690890173     | 8.55745E-07 | 0.000240839      |
| KLC3       | -1.930833675     | 0.003503628 | 0.090383672      |
| KLK14      | -5.399329254     | 6.4747E-06  | 0.000958928      |
| KLK5       | -6.531956423     | 1.41353E-09 | 1.18965E-06      |
| KLK6       | -4.255045589     | 5.99441E-05 | 0.004210383      |
| KLK7       | -3.796079195     | 0.000130252 | 0.010312589      |
| KLK8       | -3.357338504     | 1.10531E-05 | 0.001411676      |
| KRT1       | -5.82021521      | 1.36586E-08 | 8.42176E-06      |
| KRT14      | -3.110870146     | 2.09911E-05 | 0.00308143       |
| KRT15      | 2.991387168      | 1.50884E-11 | 2.692E-08        |
| KRT16      | -2.299552874     | 0.000312643 | 0.022242986      |
| KRT16P2    | -3.478852187     | 2.99137E-07 | 7.44193E-05      |
| KRT17      | -1.988661131     | 8.46583E-07 | 0.000240839      |
| KRT6B      | -3.050260469     | 1.7113E-05  | 0.002540076      |
| KRT6C      | -2.814665624     | 0.001879328 | 0.076071528      |
| KRT75      | -5.975093851     | 1.50836E-10 | 1.73576E-07      |
| KRT79      | -3.841204244     | 0.004615178 | 0.098430383      |
| KRTDAP     | -5.909316115     | 9.6021E-10  | 9.16956E-07      |
| KYNU       | 1.655702658      | 0.002534582 | 0.092577761      |
| L1CAM      | -3.577885457     | 7.54675E-07 | 0.000172233      |
| LAMA4      | -1.434700482     | 0.000466719 | 0.030493102      |
| LAMC3      | -2.142099224     | 0.002342665 | 0.077199065      |
| LCE3D      | -3.450925431     | 0.001946282 | 0.061222665      |
| LCE3E      | -4.108564795     | 0.000109183 | 0.008642106      |
| LGALS1     | -1.49899845      | 0.001729541 | 0.06954891       |
| LGALSL     | -1.871067776     | 6.92607E-05 | 0.009435815      |
| LINC00494  | 2.849798437      | 0.00158186  | 0.065005043      |
| LINC00504  | -2.502823393     | 6.3949E-05  | 0.005376494      |
| LINC00702  | -2.169482142     | 0.002336552 | 0.068058068      |
| LINC00707  | -3.340526918     | 1.83724E-05 | 0.002078312      |
| LINC00885  | 2.707574711      | 1.47141E-05 | 0.001571477      |
| LINC01006  | 1.598071689      | 0.001726971 | 0.057423254      |
| LINC01108  | 2.248777778      | 0.003407525 | 0.086344137      |
| LINC01215  | 2.231524989      | 0.002716234 | 0.083561518      |
| LINC01234  | -4.42576643      | 1.91961E-05 | 0.002174947      |
| LINC01305  | 3.532069007      | 2.91957E-08 | 1.22741E-05      |
| LINC01429  | -2.299941824     | 0.00239385  | 0.070068142      |
| LINC01524  | -3.606373658     | 0.000436324 | 0.027519921      |
| LINC01561  | -2.643013201     | 0.003042839 | 0.09150778       |
| LINC01614  | -2.743637344     | 0.000980867 | 0.038126106      |
| LINC01929  | -4.74177896      | 3.16647E-07 | 8.15564E-05      |
| LINC02614  | -1.526910094     | 2.4697E-05  | 0.003034561      |
| LIPE-AS1   | 2.090585197      | 0.000584338 | 0.027456147      |
| LIPH       | 2.344246885      | 0.00114412  | 0.046527074      |
| LIPK       | -4.176329632     | 0.000265485 | 0.019010538      |
| LMO4       | 1.490596391      | 0.000514494 | 0.030970665      |
| LMX1B      | -4.192503832     | 2.03575E-07 | 6.006E-05        |
| LNCAROD    | -4.169947204     | 2.82695E-07 | 0.000104722      |
| LOXL2      | -2.16358119      | 5.24251E-06 | 0.001048371      |
| LRCH2      | -1.898298728     | 0.000905609 | 0.036197418      |
| LRRC17     | -2.080892584     | 0.003193334 | 0.08322201       |
| LUZP2      | -3.44758118      | 0.000263617 | 0.009435815      |
| LY6G6C     | -3.862260274     | 0.000108139 | 0.008219087      |

| Gene       | log2 fold change | p-value     | adjusted p-value |
|------------|------------------|-------------|------------------|
| MAATS1     | 2.810269957      | 0.002563487 | 0.072999945      |
| MACC1      | 1.823533027      | 0.000123411 | 0.010960642      |
| MAGEA11    | -5.46296121      | 1.01477E-06 | 0.000194487      |
| MAGEA4-AS1 | -4.459993741     | 0.00013078  | 0.012527675      |
| MAGEB2     | -5.890467464     | 0.002315012 | 0.06276941       |
| MAGI2      | -1.34879939      | 0.000630775 | 0.029160143      |
| MAGI2-AS3  | -1.411937206     | 0.002520565 | 0.077213319      |
| MAJIN      | 3.196209635      | 0.000233516 | 0.022573223      |
| MAP1B      | -1.611327103     | 8.81086E-06 | 0.001480137      |
| MAP2       | -2.069721757     | 1.19059E-05 | 0.001668595      |
| MAP7D2     | 3.182483156      | 2.13829E-06 | 0.000391078      |
| MB         | -2.919783894     | 0.002200232 | 0.059513861      |
| MCM5       | 1.270322851      | 5.98612E-06 | 0.001158246      |
| MEDAG      | -1.877100244     | 0.004034983 | 0.098413508      |
| MEG8       | -1.662909369     | 0.00371007  | 0.092577761      |
| MEI1       | 4.637801557      | 1.45387E-20 | 1.61359E-16      |
| MEIS1      | 1.31075415       | 2.92982E-05 | 0.003917697      |
| MEIS3      | -2.004290038     | 0.000861193 | 0.035517541      |
| MFAP2      | -1.73914281      | 0.000318453 | 0.025303292      |
| MFAP3L     | -1.762155354     | 0.000622445 | 0.031442431      |
| MFSD4A     | 1.647357526      | 1.09695E-05 | 0.001413215      |
| MICAL2     | -1.613042981     | 0.000334156 | 0.024372283      |
| MIR9-3HG   | 3.159001183      | 9.22507E-08 | 3.86116E-05      |
| MLXIPL     | -3.117260019     | 0.00028769  | 0.016424164      |
| MME        | -2.197009775     | 4.95703E-05 | 0.004989255      |
| MMP13      | -5.105382981     | 1.35032E-11 | 2.692E-08        |
| MMP16      | -2.461185518     | 7.00883E-06 | 0.001163355      |
| MMP7       | -2.585610402     | 0.000172613 | 0.016095376      |
| MN1        | -1.763035157     | 0.001083383 | 0.045861295      |
| MS4A1      | 2.814885491      | 0.001976987 | 0.075560336      |
| MSRB3      | -2.070336788     | 2.60872E-05 | 0.003034561      |
| MSX2       | -2.699251861     | 0.000279195 | 0.017843321      |
| MTMR8      | 1.841573732      | 0.000547438 | 0.026513113      |
| MTND2P28   | -2.09427989      | 0.001244261 | 0.045074103      |
| MUC4       | 3.699248712      | 2.03003E-06 | 0.000495177      |
| MUCL1      | -5.246807679     | 6.45883E-07 | 0.000150425      |
| MYB        | 1.688474762      | 0.001600553 | 0.053140474      |
| MYBPC2     | -2.768788881     | 0.001036726 | 0.040089848      |
| MYF6       | -3.756161835     | 0.000226291 | 0.013779092      |
| MYH10      | -1.424503347     | 0.000390806 | 0.026139022      |
| MYH8       | -3.240193446     | 0.003024246 | 0.080711647      |
| MYLK       | -1.265688501     | 0.002718502 | 0.094427136      |
| MYO5A      | -1.119267646     | 0.002791993 | 0.096383318      |
| MYO5C      | 1.801210644      | 0.000259603 | 0.018774853      |
| MYOM3      | -2.927749997     | 4.94282E-05 | 0.004989255      |
| N4BP3      | 1.856429077      | 2.1748E-06  | 0.000347994      |
| NACAD      | -2.199340362     | 0.000819246 | 0.035945679      |
| NALCN      | -2.79258729      | 0.000355963 | 0.018892638      |
| NAP1L2     | -2.923608154     | 5.7938E-08  | 2.18468E-05      |
| NAV3       | -2.061278521     | 2.58632E-05 | 0.002385346      |
| NBEAP1     | -3.496844126     | 0.000978806 | 0.038363573      |
| NCAM1      | -2.142493102     | 0.000731379 | 0.029160143      |
| NCEH1      | 1.167500302      | 0.000463942 | 0.029256331      |
| NDN        | -1.988204651     | 0.000926551 | 0.036821179      |
| NEFH       | 4.330486679      | 3.00952E-14 | 9.76675E-11      |
| NELL2      | -2.150841735     | 3.96893E-05 | 0.004725796      |
| NEXMIF     | 3.380479562      | 1.53901E-08 | 7.16864E-06      |
| NFATC4     | -1.329107086     | 0.003264485 | 0.094358519      |
| NID1       | -2.166452851     | 4.26158E-07 | 0.000399482      |



| Gene        | log2 fold change | p-value     | adjusted p-value |
|-------------|------------------|-------------|------------------|
| NKAIN2      | -2.799544838     | 5.19985E-06 | 0.0007203        |
| NKD1        | -1.851342588     | 0.000192406 | 0.01530247       |
| NLRP10      | -3.908861275     | 0.000573707 | 0.040652168      |
| NMRAL2P     | -4.019028864     | 5.54463E-06 | 0.001415568      |
| NOS1        | -3.741113183     | 0.000100149 | 0.006600814      |
| NOS2        | 5.05801764       | 1.3186E-07  | 9.13252E-05      |
| NPR2        | -1.83010019      | 0.000284991 | 0.01639756       |
| NRG1        | -2.009131961     | 9.42977E-05 | 0.009344405      |
| NRTN        | 2.675622028      | 0.00203498  | 0.062881661      |
| NSD2        | 1.019047119      | 0.001842076 | 0.060543191      |
| NT5E        | -1.507382324     | 0.001127176 | 0.046017298      |
| NTM         | -1.838296276     | 0.000965445 | 0.036197418      |
| NTS         | 4.317315054      | 0.000425686 | 0.035701598      |
| NUP62CL     | 1.582757669      | 0.001671456 | 0.050182634      |
| NWD1        | 2.448862538      | 0.002397042 | 0.069498959      |
| OBSCN       | 1.468704512      | 0.001954854 | 0.076071528      |
| OLFM2       | -2.502211404     | 4.2743E-07  | 8.86984E-05      |
| OLFM4       | -2.720154221     | 0.003925878 | 0.096543882      |
| OLMALINC    | 1.813803156      | 0.000165833 | 0.010902336      |
| OPCML       | -3.410158014     | 0.002140076 | 0.079576706      |
| OR2B2       | 2.561955162      | 0.002910676 | 0.082633353      |
| OR7E13P     | -2.187878638     | 0.001670313 | 0.056347592      |
| OR7E14P     | 2.351415539      | 0.002763923 | 0.077213319      |
| OR7E2P      | -2.019314876     | 0.002775508 | 0.076578067      |
| P3H3        | -1.712048688     | 0.000883352 | 0.035701598      |
| PALM2       | -1.54092964      | 0.001254757 | 0.045351509      |
| PAPPA2      | -3.125804608     | 0.000308635 | 0.017269126      |
| PAQR5       | -1.806504857     | 0.000381557 | 0.017295077      |
| PART1       | 2.015155554      | 0.001512534 | 0.046611575      |
| PAX1        | 4.34711794       | 0.001903527 | 0.061222665      |
| PAX3        | -3.569019622     | 0.000579946 | 0.027502561      |
| PAX9        | 1.926316672      | 8.89833E-05 | 0.008960683      |
| PCA3        | -3.187582193     | 0.000944585 | 0.037566739      |
| PCBD2       | 1.091524194      | 0.000529115 | 0.027502561      |
| PCDH9       | -2.170977701     | 0.001811751 | 0.064998061      |
| PCDHB4      | -3.128947663     | 9.72474E-05 | 0.00740438       |
| PCDHGA11    | -1.561564557     | 0.001696315 | 0.055967911      |
| PCDHGA12    | -1.782014974     | 0.001472855 | 0.04589425       |
| PCDHGA2     | -2.545170988     | 2.77743E-05 | 0.001679001      |
| PCDHGA4     | -2.870468058     | 2.85828E-07 | 7.48565E-05      |
| PCDHGB1     | -2.520478403     | 0.001946574 | 0.061222665      |
| PCDHGB4     | -2.302410412     | 0.000206583 | 0.010563841      |
| PCDHGB5     | -1.890322545     | 0.000411984 | 0.021438607      |
| PCDHGB6     | -1.436262443     | 0.002270362 | 0.057149213      |
| PCDHGB7     | -1.49951901      | 0.002469393 | 0.070677887      |
| PCDHGB9P    | -1.406419558     | 0.00245057  | 0.06786492       |
| PCDHGC3     | -1.610790676     | 0.000739608 | 0.035701598      |
| PCDHGC4     | -1.949449093     | 0.000236079 | 0.011676298      |
| PCSK5       | -1.899942523     | 4.96544E-05 | 0.00740438       |
| PDGFC       | -1.613970484     | 0.00084526  | 0.038363573      |
| PDPN        | -1.530013317     | 0.002190095 | 0.094671528      |
| PHACTR2-AS1 | 1.419485125      | 0.003396048 | 0.086329579      |
| PI15        | -1.876978462     | 0.001813402 | 0.065005043      |
| PI3         | -3.102231597     | 0.000857857 | 0.050790647      |
| PIK3R3      | 1.518452704      | 1.28509E-07 | 6.35859E-05      |
| PITX1       | 1.731527489      | 7.81415E-06 | 0.001221886      |
| PKIA-AS1    | 2.206122346      | 0.003221944 | 0.083558677      |
| PLA2G16     | -2.088139018     | 6.13959E-05 | 0.005135236      |
| PLA2G2D     | 3.056439156      | 0.000646991 | 0.027141098      |

| Gene         | log2 fold change | p-value     | adjusted p-value |
|--------------|------------------|-------------|------------------|
| PLAC8        | 3.873834385      | 2.76615E-13 | 9.58077E-10      |
| PLCB4        | -1.998395249     | 0.000723793 | 0.026805535      |
| PLEKHG4B     | -2.533765339     | 0.000237741 | 0.020008649      |
| PLK2         | -1.375737694     | 0.00031093  | 0.021735695      |
| PLPP4        | -2.607246979     | 0.00092378  | 0.033922508      |
| PLSCR3       | -1.27076812      | 0.001589791 | 0.060543191      |
| PLXDC2       | -1.381543387     | 0.000639015 | 0.035690478      |
| PNLIPRP3     | -6.81861916      | 3.0794E-11  | 3.30019E-08      |
| PODXL2       | 1.794192191      | 0.002971579 | 0.079699308      |
| POPDC3       | -2.752033612     | 0.000338816 | 0.018448904      |
| POSTN        | -2.413318        | 3.82695E-05 | 0.004834902      |
| POTEE        | -3.577414023     | 1.23746E-07 | 4.87824E-05      |
| PRDM15       | 1.085296116      | 8.81706E-06 | 0.001980788      |
| PRDX3P4      | -1.924624217     | 0.002009211 | 0.062569467      |
| PRICKLE2-AS3 | -2.361684597     | 0.003166013 | 0.053940975      |
| PRIMA1       | 1.842281758      | 0.00400285  | 0.098077562      |
| PRMT8        | -4.529325884     | 0.002655292 | 0.09806977       |
| PROSER2-AS1  | 1.731441023      | 0.003222509 | 0.077305173      |
| PRSS12       | 1.696083892      | 1.04165E-05 | 0.001679001      |
| PRSS23       | -1.644529877     | 0.000531982 | 0.032815825      |
| PSG3         | 3.350614899      | 0.003318175 | 0.085032425      |
| PSG8         | 3.339625857      | 0.003016333 | 0.074692225      |
| PSORS1C1     | -2.206947549     | 0.002047344 | 0.068914295      |
| PTHLH        | -3.117854842     | 1.67953E-05 | 0.003034561      |
| PTK7         | -1.296623659     | 0.000421218 | 0.031544244      |
| PTPRD        | -2.489143612     | 7.71738E-06 | 0.001204187      |
| PTPRN        | -3.689223573     | 0.000213628 | 0.013260627      |
| PXDN         | -1.859024798     | 7.61439E-05 | 0.008048485      |
| PYGL         | -1.814296555     | 0.001485934 | 0.062623169      |
| QRSL1P1      | -4.356803263     | 4.95975E-09 | 2.47825E-06      |
| RAB3B        | -3.044775245     | 3.08712E-06 | 0.000525076      |
| RAD9B        | 2.216870008      | 6.19746E-06 | 0.000532392      |
| RANBP17      | 2.527563607      | 1.36693E-07 | 5.17308E-05      |
| RASSF6       | 1.68533664       | 0.002486731 | 0.078805664      |
| RASSF9       | 2.099845909      | 0.000694995 | 0.049053394      |
| RDH12        | -3.663551844     | 0.000343631 | 0.01675155       |
| RFPL1S       | 3.903665979      | 3.57057E-09 | 2.04989E-06      |
| RFX8         | -2.571412051     | 0.000303458 | 0.017807293      |
| RHBDL3       | 2.418076531      | 0.000607282 | 0.028008327      |
| RHOB         | -1.589990372     | 9.0697E-05  | 0.009068564      |
| RHOBTB1      | -1.300242084     | 0.003003542 | 0.077213319      |
| RHOD         | -2.027069561     | 0.000478989 | 0.021687605      |
| RIBC2        | 2.331779442      | 2.09793E-05 | 0.002380553      |
| RMI2         | 1.381931971      | 0.001223581 | 0.049153695      |
| RN7SL471P    | -3.952957479     | 0.002048751 | 0.070068142      |
| RNF165       | 2.162465498      | 0.000526777 | 0.039163722      |
| RNF212       | 2.861032825      | 2.07363E-05 | 0.004989255      |
| RNF217-AS1   | -1.752625973     | 0.001892065 | 0.060574507      |
| RPE65        | -5.463590271     | 0.000252837 | 0.015194966      |
| RPLP0P2      | -2.151592359     | 0.000118547 | 0.005091888      |
| RPSAP52      | -2.690946525     | 0.002121093 | 0.065005043      |
| RTKN2        | 1.416717871      | 0.000272985 | 0.026870065      |
| RTL1         | -2.217975244     | 0.002608883 | 0.077305173      |
| SALL1        | -2.754357531     | 0.000233421 | 0.015041719      |
| SBSN         | -3.321994568     | 0.002045122 | 0.077412466      |
| SCARA5       | -3.669351132     | 2.69151E-08 | 6.78903E-06      |
| SCARF2       | -2.068863676     | 0.001539858 | 0.052602904      |
| SCG2         | -2.905764926     | 0.000189954 | 0.013779092      |
| SCIN         | 2.161900837      | 0.003953042 | 0.09807907       |

| Gene        | log2 fold change | p-value     | adjusted p-value |
|-------------|------------------|-------------|------------------|
| SCN9A       | -2.310120201     | 0.000292373 | 0.016704812      |
| SERPINE1    | -2.194218127     | 2.22911E-05 | 0.003251689      |
| SERPINI2    | 4.363164662      | 1.13103E-05 | 0.001413215      |
| SFRP2       | -2.018120691     | 0.002110936 | 0.078662366      |
| SGCD        | -1.856280999     | 0.0014853   | 0.077783207      |
| SH3RF3      | -1.728886814     | 6.01909E-05 | 0.004867383      |
| SHANK1      | -3.28229112      | 1.95751E-05 | 0.002236859      |
| SHANK2      | -2.589152772     | 0.001686978 | 0.061222665      |
| SHCBP1L     | 3.985885762      | 0.000482311 | 0.031442431      |
| SIM2        | 2.262395946      | 0.000227981 | 0.017295077      |
| SIRPG       | 1.640776734      | 0.002891438 | 0.077744979      |
| SIX6        | 2.640074154      | 0.002057971 | 0.077943181      |
| SLC22A3     | -2.839487331     | 4.36639E-06 | 0.001015587      |
| SLC24A2     | -2.106471966     | 0.000470446 | 0.024080908      |
| SLC24A3     | -1.833993761     | 0.000798681 | 0.03694107       |
| SLC25A21    | 2.040439125      | 0.002256532 | 0.067256016      |
| SLC26A9     | 2.067077367      | 0.000525213 | 0.026222515      |
| SLC29A4     | -1.866469181     | 0.00389685  | 0.097685371      |
| SLC47A2     | -2.327815194     | 7.56719E-05 | 0.007013336      |
| SLC4A3      | -1.676129085     | 0.001786538 | 0.058246599      |
| SLC6A10P    | -4.571362522     | 0.000109916 | 0.008219087      |
| SLC6A2      | -3.32971249      | 8.48813E-05 | 0.006366872      |
| SLC7A11     | -2.520768467     | 0.000143324 | 0.012572584      |
| SLC7A11-AS1 | -2.414417028     | 0.002831733 | 0.077213319      |
| SLC7A8      | -2.009670301     | 3.1398E-06  | 0.000958928      |
| SLCO1A2     | -3.369901394     | 0.002355988 | 0.061352743      |
| SLCO1B3     | -4.748056651     | 0.000121579 | 0.007725782      |
| SLCO1B7     | -4.505713539     | 0.000894767 | 0.047660958      |
| SLCO1C1     | -2.90827834      | 2.46027E-05 | 0.002655683      |
| SLFN13      | 2.56914075       | 7.18485E-16 | 3.89252E-12      |
| SLITRK6     | -3.066948144     | 3.27867E-05 | 0.003325068      |
| SMC1B       | 4.259431048      | 4.61709E-26 | 2.07855E-21      |
| SMOX        | -2.12576504      | 8.98041E-06 | 0.001205601      |
| SMTN        | -1.319564112     | 0.001327658 | 0.076071528      |
| SNAI2       | -1.577257448     | 1.28985E-06 | 0.000340877      |
| SNAP25-AS1  | -3.659282029     | 0.002493244 | 0.071126435      |
| SNHG26      | -1.419262507     | 0.001408027 | 0.097685371      |
| SOHLH2      | -3.802524533     | 0.000470109 | 0.031224387      |
| SORCS2      | -2.007268641     | 0.000605818 | 0.023504759      |
| SOSTDC1     | -4.334794869     | 7.57412E-06 | 0.000618122      |
| SOWAHB      | 1.658487107      | 0.002700668 | 0.075958636      |
| SOX30       | 2.839486546      | 4.28321E-05 | 0.004037699      |
| SPARC       | -1.727709109     | 0.002687767 | 0.092015505      |
| SPATA12     | 1.982361315      | 1.11392E-07 | 3.09403E-05      |
| SPEG        | -2.25529072      | 0.000119239 | 0.009649897      |
| SPIB        | 2.075198327      | 0.003824621 | 0.086167076      |
| SPOCD1      | -1.954254546     | 0.003774789 | 0.094427136      |
| SPOCK1      | -2.766645144     | 2.89235E-06 | 0.000559512      |
| SPON1       | -1.533676225     | 0.001087634 | 0.051257854      |
| SPRR2G      | -5.178757697     | 3.08955E-06 | 0.000525076      |
| SPRR4       | -3.521238798     | 0.000850221 | 0.035648686      |
| SRCIN1      | -1.932103468     | 0.001542113 | 0.047211154      |
| SRPX        | -3.074172717     | 2.59786E-07 | 7.14473E-05      |
| ST6GALNAC1  | 2.187654867      | 0.003500382 | 0.088555361      |
| STAG3       | 1.65370683       | 0.000172926 | 0.01675155       |
| STIL        | 1.128305851      | 0.000678459 | 0.037184952      |
| SULF2       | -1.766558264     | 7.09802E-05 | 0.006897844      |
| SVIP        | 1.587038115      | 0.002204781 | 0.063583896      |
| SYCP2       | 3.526050671      | 1.43979E-16 | 3.89252E-12      |

| Gene       | log2 fold change | p-value     | adjusted p-value |
|------------|------------------|-------------|------------------|
| SYCP3      | 1.859252662      | 0.001289814 | 0.063583896      |
| SYNGR3     | 2.22532891       | 0.000186746 | 0.011877507      |
| TAF7L      | 3.266721068      | 2.30594E-06 | 0.000377985      |
| TCAIM      | 1.036170355      | 0.002750164 | 0.083353696      |
| TCAM1P     | 3.084259739      | 7.32169E-07 | 0.000190305      |
| TCF19      | 1.378542077      | 0.000351884 | 0.03064381       |
| TCHH       | -3.869725518     | 4.30975E-08 | 1.54608E-05      |
| TCHHL1     | -3.280271855     | 0.000605488 | 0.027794579      |
| TCP11      | 2.958254421      | 0.000215586 | 0.01350649       |
| TDRD10     | 3.203335711      | 0.00015064  | 0.009367018      |
| TDRD12     | -4.303785815     | 0.001946237 | 0.061222665      |
| TDRD9      | 3.257697034      | 0.000281409 | 0.014103396      |
| TENM2      | -3.791032183     | 3.27967E-10 | 1.18965E-06      |
| TEX30      | 1.353804723      | 0.005338344 | 0.09930371       |
| TEX41      | -2.199769858     | 0.000366356 | 0.016222545      |
| TFP12      | -3.347003536     | 1.24981E-05 | 0.001522559      |
| TGFB1      | -1.918055033     | 0.000795772 | 0.04282384       |
| THBS1      | -1.508682048     | 0.000185072 | 0.013882121      |
| THBS2      | -2.211659177     | 3.42477E-05 | 0.004513288      |
| TIMP3      | -1.801508806     | 0.00149836  | 0.051959065      |
| TJP3       | 2.789286342      | 1.89609E-06 | 0.00036627       |
| TLL1       | -2.02585617      | 0.002258038 | 0.060543191      |
| TLN2       | -1.623022113     | 3.62725E-05 | 0.004048936      |
| TLR10      | 2.391850646      | 3.87671E-05 | 0.003812434      |
| TMEM158    | -2.080517878     | 0.00056552  | 0.016424164      |
| TMEM45A    | -2.156205976     | 3.11846E-05 | 0.005091888      |
| TMEM51-AS1 | 1.815574116      | 0.002042194 | 0.063603641      |
| TMPRSS2    | 2.698646436      | 9.53344E-05 | 0.008219087      |
| TNC        | -1.943678747     | 2.92681E-05 | 0.00306464       |
| TNFAIP8    | 1.026458574      | 0.000500159 | 0.031442431      |
| TNFRSF13B  | 2.708678201      | 0.00046585  | 0.025235159      |
| TNFRSF13C  | 1.606175898      | 0.002301713 | 0.076071528      |
| TNIP3      | 2.249255178      | 0.002820791 | 0.077213319      |
| TNNT1      | -2.534787495     | 0.001783024 | 0.047579083      |
| TPM1       | -1.624266176     | 0.000523098 | 0.031228364      |
| TPM1-AS    | -1.61604278      | 0.003457465 | 0.0894773        |
| TPM2       | -1.65167983      | 0.002308543 | 0.076071528      |
| TRABD2B    | -2.521376553     | 1.2435E-05  | 0.000958928      |
| TRAM1L1    | -3.306410199     | 0.000404215 | 0.028008327      |
| TRIM73     | 1.599869541      | 0.001279506 | 0.038126106      |
| TSPAN18    | -1.61675442      | 0.000691965 | 0.027141098      |
| TTC6       | 3.960295388      | 6.78064E-13 | 1.05408E-09      |
| TUBA1A     | -1.39468969      | 0.000504851 | 0.027502561      |
| TWIST1     | -1.888766492     | 0.000554661 | 0.025632554      |
| UBTD1      | -1.802219876     | 0.000624103 | 0.017324097      |
| UNC5C      | -2.906210957     | 1.38744E-09 | 1.18965E-06      |
| UPB1       | 3.756219579      | 5.63329E-08 | 2.17597E-05      |
| USP2       | -1.993370273     | 0.001601006 | 0.05084661       |
| VCAM1      | 2.19756125       | 0.001895196 | 0.074588816      |
| VCAN       | -1.653446538     | 0.002123813 | 0.077783207      |
| VEGFC      | -2.530755407     | 2.26371E-05 | 0.002494058      |
| VGLL3      | -1.70557936      | 0.000442171 | 0.032815825      |
| VN1R54P    | -4.775355956     | 0.001061339 | 0.045439928      |
| WDR49      | 3.118542495      | 0.00079241  | 0.033111947      |
| WDR66      | -1.526458832     | 0.001871642 | 0.063924837      |
| WDR76      | 1.478437054      | 5.59633E-06 | 0.001410559      |
| WFDC12     | -4.239492053     | 6.18981E-05 | 0.005958183      |
| WNK3       | 2.540618582      | 3.53697E-10 | 3.61796E-07      |
| XLCL1      | -3.948608838     | 3.76083E-09 | 2.22523E-06      |

| Gene      | log2 fold change | <i>p</i> -value | adjusted <i>p</i> -value |
|-----------|------------------|-----------------|--------------------------|
| YBX2      | 2.025119582      | 0.00103949      | 0.044374578              |
| ZBTB8B    | 4.199467565      | 0.002608937     | 0.07351925               |
| ZFPM2     | -1.771937582     | 0.002953118     | 0.079576706              |
| ZFPM2-AS1 | -3.715861666     | 7.73187E-09     | 4.08166E-06              |
| ZFR2      | 5.464623871      | 2.19871E-13     | 5.12698E-10              |
| ZMAT1     | 2.123352782      | 3.71492E-08     | 1.73114E-05              |
| ZNF100    | 1.502793522      | 0.000765184     | 0.036197418              |
| ZNF214    | 1.699528126      | 0.002494719     | 0.070677887              |
| ZNF365    | -2.196348627     | 9.46093E-06     | 0.001249116              |
| ZNF469    | -2.303341632     | 2.57803E-05     | 0.004680416              |
| ZNF521    | -1.467244896     | 0.002651715     | 0.078925501              |
| ZNF541    | 4.382603949      | 2.3272E-13      | 5.26514E-10              |
| ZNF718    | 1.394676605      | 0.00019515      | 0.013987354              |
| ZNF969P   | -2.87403225      | 0.002031742     | 0.069737726              |
| ZBP2      | 3.645587779      | 0.000578706     | 0.035945679              |
| ZSCAN31   | -1.466627899     | 0.002713098     | 0.082633353              |
| ZYG11A    | 1.829225531      | 3.71446E-05     | 0.004048936              |

## Supplementary Table S8

Genes likely to be regulated by the signature miRNAs and belonging to the signalling pathways that showed differential activity between HPV-positive and HPV-negative cases in Progeny analysis (*MAP kinase*, *Estrogen*, *EGFR*, *TGFbeta* and *WNT* signalling pathway). Genes were identified by matching the identified statistically significant miRNA-gene interactions with pathway gene sets from the Reactome database.

### EGFR signalling pathway

| gene    | miRNA                                                          |
|---------|----------------------------------------------------------------|
| ARHGEF7 | hsa-miR-181a-5p, hsa-miR-205-3p                                |
| CBL     | hsa-miR-7-5p, hsa-miR-7851-3p                                  |
| CDC42   | hsa-miR-92b-3p, hsa-miR-18a-5p                                 |
| EGFR    | hsa-miR-7-5p                                                   |
| EPS15   | hsa-miR-152-3p, hsa-miR-3174                                   |
| GAB1    | hsa-miR-7-5p                                                   |
| GRB2    | hsa-miR-96-5p, hsa-miR-378a-3p                                 |
| HBEGF   | hsa-miR-96-5p                                                  |
| KRAS    | hsa-miR-96-5p, hsa-miR-501-3p, hsa-miR-7851-3p, hsa-miR-155-5p |
| NRAS    | hsa-miR-3135b, hsa-miR-152-3p                                  |
| PAG1    | hsa-miR-152-3p, hsa-miR-6763-5p                                |
| PIK3CA  | hsa-miR-92b-3p, hsa-miR-155-5p                                 |
| PIK3R1  | hsa-miR-96-5p, hsa-miR-455-3p                                  |
| PLCG1   | hsa-miR-96-5p                                                  |
| PTPRK   | hsa-miR-92b-3p                                                 |
| PXN     | hsa-miR-3135b                                                  |
| SH3GL2  | hsa-miR-1234-3p                                                |
| SH3GL3  | hsa-miR-205-3p                                                 |
| SH3KBP1 | hsa-miR-96-5p                                                  |
| SHC1    | hsa-miR-96-5p, hsa-miR-6763-5p                                 |
| SOS1    | hsa-miR-152-3p, hsa-miR-205-3p, hsa-miR-155-5p                 |
| STAM2   | hsa-miR-378a-3p                                                |
| TGFA    | hsa-miR-152-3p, hsa-miR-7-5p                                   |

### Estrogen signalling pathway

| gene   | miRNA                                                          |
|--------|----------------------------------------------------------------|
| AGO2   | hsa-miR-654-5p                                                 |
| AGO4   | hsa-miR-181a-5p, hsa-miR-152-3p, hsa-miR-96-5p, hsa-miR-455-3p |
| AKT1   | hsa-miR-501-3p                                                 |
| AKT3   | hsa-miR-654-5p, hsa-miR-181a-5p                                |
| CALM1  | hsa-miR-181a-5p                                                |
| CARM1  | hsa-miR-654-5p, hsa-miR-181a-5p                                |
| CAV1   | hsa-miR-205-3p, hsa-miR-96-5p                                  |
| CHD1   | hsa-miR-152-3p                                                 |
| CXCL12 | hsa-miR-1238-3p                                                |
| CXXC5  | hsa-miR-92b-3p                                                 |
| EBAG9  | hsa-miR-501-3p                                                 |
| EGFR   | hsa-miR-7-5p                                                   |
| ELK1   | hsa-miR-6763-5p, hsa-miR-3135b                                 |
| EP300  | hsa-miR-96-5p                                                  |
| ESR1   | hsa-miR-181a-5p, hsa-miR-152-3p, hsa-miR-18a-5p                |
| FOS    | hsa-miR-155-5p, hsa-miR-181a-5p                                |
| FOXO3  | hsa-miR-96-5p                                                  |
| GNAI1  | hsa-miR-181a-5p                                                |
| GNAI2  | hsa-miR-663b, hsa-miR-3135b                                    |
| GNB2   | hsa-miR-7851-3p                                                |
| GNB3   | hsa-miR-6763-5p                                                |
| GNB4   | hsa-miR-96-5p                                                  |

|         |                                                                            |
|---------|----------------------------------------------------------------------------|
| GNB5    | hsa-miR-152-3p, hsa-miR-455-3p                                             |
| GNG12   | hsa-miR-96-5p                                                              |
| GNG2    | hsa-miR-181a-5p, hsa-miR-3132, hsa-miR-18a-5p                              |
| GNG3    | hsa-miR-654-5p                                                             |
| GNG7    | hsa-miR-492, hsa-miR-6763-5p                                               |
| GTF2A1  | hsa-miR-92b-3p, hsa-miR-7-5p                                               |
| HBEGF   | hsa-miR-96-5p                                                              |
| IGF1R   | hsa-miR-378a-3p, hsa-miR-96-5p, hsa-miR-492                                |
| JUN     | hsa-miR-92b-3p                                                             |
| KANK1   | hsa-miR-181a-5p                                                            |
| KAT2B   | hsa-miR-181a-5p, hsa-miR-92b-3p                                            |
| KRAS    | hsa-miR-96-5p, hsa-miR-501-3p, hsa-miR-7851-3p, hsa-miR-155-5p             |
| MAPK1   | hsa-miR-378a-3p                                                            |
| MED1    | hsa-miR-96-5p                                                              |
| MMP3    | hsa-miR-18a-5p                                                             |
| MMP7    | hsa-miR-181a-5p                                                            |
| MYB     | hsa-miR-96-5p                                                              |
| NCOA1   | hsa-miR-18a-5p, hsa-miR-92b-3p                                             |
| NRAS    | hsa-miR-3135b, hsa-miR-152-3p                                              |
| PIK3CA  | hsa-miR-92b-3p, hsa-miR-155-5p                                             |
| PIK3R1  | hsa-miR-96-5p, hsa-miR-455-3p                                              |
| PIK3R3  | hsa-miR-181a-5p                                                            |
| POLR2E  | hsa-miR-663b, hsa-miR-6746-5p                                              |
| POLR2F  | hsa-miR-205-3p                                                             |
| POU2F1  | hsa-miR-96-5p, hsa-miR-3135b, hsa-miR-654-5p, hsa-miR-18a-5p, hsa-miR-7-5p |
| PRKCZ   | hsa-miR-152-3p                                                             |
| PTGES3  | hsa-miR-152-3p, hsa-miR-378a-3p                                            |
| PTK2    | hsa-miR-7-5p                                                               |
| RAD21   | hsa-miR-205-3p, hsa-miR-501-3p, hsa-miR-92b-3p, hsa-miR-181a-5p            |
| SHC1    | hsa-miR-96-5p, hsa-miR-6763-5p                                             |
| SMC1A   | hsa-miR-455-3p                                                             |
| SP1     | hsa-miR-205-3p, hsa-miR-7-5p                                               |
| SRF     | hsa-miR-3135b, hsa-miR-7-5p                                                |
| STAG2   | hsa-miR-181a-5p, hsa-miR-92b-3p                                            |
| TBP     | hsa-miR-152-3p, hsa-miR-654-5p                                             |
| TFF3    | hsa-miR-7-5p                                                               |
| TGFA    | hsa-miR-152-3p, hsa-miR-7-5p                                               |
| TNRC6A  | hsa-miR-152-3p, hsa-miR-654-5p, hsa-miR-96-5p, hsa-miR-7-5p                |
| TNRC6B  | hsa-miR-18a-5p, hsa-miR-7-5p, hsa-miR-92b-3p                               |
| TNRC6C  | hsa-miR-152-3p                                                             |
| TRAM1   | hsa-miR-155-5p                                                             |
| UHMK1   | hsa-miR-18a-5p, hsa-miR-7-5p                                               |
| USF2    | hsa-miR-92b-3p                                                             |
| XPO1    | hsa-miR-205-3p, hsa-miR-455-3p                                             |
| ZDHHC21 | hsa-miR-455-3p, hsa-miR-205-3p                                             |
| ZDHHC7  | hsa-miR-152-3p, hsa-miR-181a-5p                                            |
| ZNF217  | hsa-miR-152-3p                                                             |

#### MAPK signaling pathway

| gene    | miRNA                                           |
|---------|-------------------------------------------------|
| AGGF1   | hsa-miR-6763-5p                                 |
| AGTRAP  | hsa-miR-155-5p                                  |
| AKAP9   | hsa-miR-205-3p                                  |
| ARAF    | hsa-miR-654-5p                                  |
| ARRB2   | hsa-miR-155-5p                                  |
| BCL2L11 | hsa-miR-152-3p, hsa-miR-92b-3p, hsa-miR-181a-5p |
| BRAP    | hsa-miR-181a-5p                                 |
| CALM1   | hsa-miR-181a-5p                                 |
| CAMK2A  | hsa-miR-92b-3p, hsa-miR-654-5p, hsa-miR-3135b   |
| CAMK2D  | hsa-miR-7-5p                                    |
| CAMK2G  | hsa-miR-3135b                                   |

|          |                                                                              |
|----------|------------------------------------------------------------------------------|
| CLCN6    | hsa-miR-152-3p, hsa-miR-3132                                                 |
| CNKSR2   | hsa-miR-181a-5p                                                              |
| DUSP10   | hsa-miR-92b-3p, hsa-miR-181a-5p                                              |
| DUSP16   | hsa-miR-205-3p, hsa-miR-18a-5p                                               |
| DUSP9    | hsa-miR-1246                                                                 |
| ESRP1    | hsa-miR-92b-3p                                                               |
| FAM114A2 | hsa-miR-7-5p                                                                 |
| FAM131B  | hsa-miR-7-5p                                                                 |
| FXR1     | hsa-miR-92b-3p, hsa-miR-155-5p, hsa-miR-7-5p                                 |
| IQGAP1   | hsa-miR-205-3p, hsa-miR-7-5p                                                 |
| ITGB3    | hsa-miR-1234-3p                                                              |
| KDM7A    | hsa-miR-7-5p, hsa-miR-501-3p, hsa-miR-205-3p, hsa-miR-155-5p, hsa-miR-18a-5p |
| KIAA1549 | hsa-miR-205-3p                                                               |
| KRAS     | hsa-miR-96-5p, hsa-miR-501-3p, hsa-miR-7851-3p, hsa-miR-155-5p               |
| KSR1     | hsa-miR-7-5p                                                                 |
| KSR2     | hsa-miR-92b-3p                                                               |
| LMNA     | hsa-miR-6763-5p, hsa-miR-96-5p                                               |
| MAP2K2   | hsa-miR-654-5p                                                               |
| MAPK1    | hsa-miR-378a-3p                                                              |
| MRAS     | hsa-miR-654-5p, hsa-miR-96-5p, hsa-miR-152-3p                                |
| NRAS     | hsa-miR-3135b, hsa-miR-152-3p                                                |
| PEBP1    | hsa-miR-3174                                                                 |
| PPP1CB   | hsa-miR-152-3p                                                               |
| PPP1CC   | hsa-miR-8071                                                                 |
| QKI      | hsa-miR-96-5p, hsa-miR-501-3p, hsa-miR-181a-5p                               |
| RAF1     | hsa-miR-7-5p                                                                 |
| RAP1A    | hsa-miR-92b-3p                                                               |
| RAP1B    | hsa-miR-92b-3p, hsa-miR-181a-5p, hsa-miR-378a-3p                             |
| SPRED1   | hsa-miR-205-3p, hsa-miR-155-5p                                               |
| TENT4A   | hsa-miR-92b-3p                                                               |
| TLN1     | hsa-miR-6763-5p                                                              |
| TRAK1    | hsa-miR-181a-5p                                                              |
| YWHAB    | hsa-miR-205-3p, hsa-miR-7-5p                                                 |
| ZC3HAV1  | hsa-miR-205-3p                                                               |

#### TGFb signalling pathway

| gene   | miRNA                                         |
|--------|-----------------------------------------------|
| CBL    | hsa-miR-7-5p, hsa-miR-7851-3p                 |
| CCNC   | hsa-miR-3135b, hsa-miR-92b-3p                 |
| CCNT2  | hsa-miR-7-5p, hsa-miR-155-5p                  |
| CGN    | hsa-miR-654-5p                                |
| COL1A2 | hsa-miR-92b-3p, hsa-miR-7-5p                  |
| E2F5   | hsa-miR-181a-5p, hsa-miR-96-5p                |
| EP300  | hsa-miR-96-5p                                 |
| F11R   | hsa-miR-501-3p, hsa-miR-654-5p                |
| FBN1   | hsa-miR-152-3p                                |
| FKBP1A | hsa-miR-181a-5p                               |
| FURIN  | hsa-miR-3132                                  |
| ITGA8  | hsa-miR-92b-3p                                |
| ITGAV  | hsa-miR-92b-3p                                |
| ITGB1  | hsa-miR-455-3p                                |
| ITGB3  | hsa-miR-1234-3p                               |
| ITGB8  | hsa-miR-3132, hsa-miR-181a-5p, hsa-miR-205-3p |
| LTBP1  | hsa-miR-152-3p, hsa-miR-6763-5p               |
| MAPK1  | hsa-miR-378a-3p                               |
| MEN1   | hsa-miR-3135b                                 |
| NCOR1  | hsa-miR-205-3p                                |
| NEDD4L | hsa-miR-92b-3p                                |
| PARP1  | hsa-miR-7-5p                                  |
| PMEPA1 | hsa-miR-92b-3p, hsa-miR-96-5p                 |
| PPM1A  | hsa-miR-96-5p, hsa-miR-3135b, hsa-miR-654-5p  |



|          |                                                                                               |
|----------|-----------------------------------------------------------------------------------------------|
| PPP1CA   | hsa-miR-654-5p                                                                                |
| PPP1CB   | hsa-miR-152-3p                                                                                |
| PPP1CC   | hsa-miR-8071                                                                                  |
| PRKCZ    | hsa-miR-152-3p                                                                                |
| RHOA     | hsa-miR-3135b                                                                                 |
| RNF111   | hsa-miR-7-5p                                                                                  |
| SCG2     | hsa-miR-155-5p                                                                                |
| SERPINE1 | hsa-miR-654-5p                                                                                |
| SKI      | hsa-miR-654-5p                                                                                |
| SKIL     | hsa-miR-96-5p, hsa-miR-205-3p                                                                 |
| SMAD2    | hsa-miR-455-3p, hsa-miR-18a-5p                                                                |
| SMAD7    | hsa-miR-96-5p, hsa-miR-92b-3p                                                                 |
| SMURF1   | hsa-miR-92b-3p                                                                                |
| SP1      | hsa-miR-205-3p, hsa-miR-7-5p                                                                  |
| STUB1    | hsa-miR-455-3p                                                                                |
| TFDP2    | hsa-miR-205-3p, hsa-miR-92b-3p, hsa-miR-155-5p, hsa-miR-501-3p, hsa-miR-96-5p, hsa-miR-152-3p |
| TGFB1    | hsa-miR-18a-5p, hsa-miR-654-5p                                                                |
| TGFB2    | hsa-miR-7-5p, hsa-miR-152-3p                                                                  |
| TGFBR1   | hsa-miR-96-5p                                                                                 |
| TGIF1    | hsa-miR-92b-3p                                                                                |
| TGIF2    | hsa-miR-181a-5p                                                                               |
| TRIM33   | hsa-miR-7-5p                                                                                  |
| UBE2D1   | hsa-miR-152-3p                                                                                |
| UBE2D3   | hsa-miR-7-5p, hsa-miR-181a-5p                                                                 |
| USP9X    | hsa-miR-654-5p, hsa-miR-155-5p                                                                |
| XPO1     | hsa-miR-205-3p, hsa-miR-455-3p                                                                |
| YBX1     | hsa-miR-3135b                                                                                 |
| ZFYVE9   | hsa-miR-8071                                                                                  |

#### WNT signaling pathway

| gene    | miRNA                                                          |
|---------|----------------------------------------------------------------|
| AGO2    | hsa-miR-654-5p                                                 |
| AGO4    | hsa-miR-181a-5p, hsa-miR-152-3p, hsa-miR-96-5p, hsa-miR-455-3p |
| AKT1    | hsa-miR-501-3p                                                 |
| AP2A1   | hsa-miR-455-3p                                                 |
| AP2B1   | hsa-miR-96-5p, hsa-miR-205-3p, hsa-miR-492, hsa-miR-3174       |
| APC     | hsa-miR-205-3p                                                 |
| ARRB2   | hsa-miR-155-5p                                                 |
| ASH2L   | hsa-miR-6763-5p                                                |
| AXIN2   | hsa-miR-205-3p                                                 |
| BCL9    | hsa-miR-654-5p, hsa-miR-92b-3p, hsa-miR-455-3p                 |
| CALM1   | hsa-miR-181a-5p                                                |
| CAMK2A  | hsa-miR-92b-3p, hsa-miR-654-5p, hsa-miR-3135b                  |
| CAV1    | hsa-miR-205-3p, hsa-miR-96-5p                                  |
| CCDC88C | hsa-miR-96-5p                                                  |
| CDC73   | hsa-miR-1246, hsa-miR-181a-5p, hsa-miR-155-5p                  |
| CHD8    | hsa-miR-155-5p                                                 |
| CLTB    | hsa-miR-6763-5p                                                |
| CLTC    | hsa-miR-96-5p, hsa-miR-455-3p                                  |
| CSNK1A1 | hsa-miR-3174, hsa-miR-6763-5p, hsa-miR-501-3p                  |
| CSNK1G2 | hsa-miR-155-5p, hsa-miR-378a-3p                                |
| CSNK2A1 | hsa-miR-3132                                                   |
| CSNK2A2 | hsa-miR-654-5p                                                 |
| CTNBP1  | hsa-miR-92b-3p                                                 |
| CUL3    | hsa-miR-92b-3p, hsa-miR-181a-5p, hsa-miR-455-3p                |
| CXXC4   | hsa-miR-92b-3p, hsa-miR-8071, hsa-miR-663b                     |
| DAAM1   | hsa-miR-96-5p, hsa-miR-3174                                    |
| DACT1   | hsa-miR-92b-3p                                                 |
| DKK2    | hsa-miR-8071                                                   |
| EP300   | hsa-miR-96-5p                                                  |
| FRAT1   | hsa-miR-205-3p                                                 |

|         |                                                                |
|---------|----------------------------------------------------------------|
| FZD3    | hsa-miR-96-5p, hsa-miR-205-3p, hsa-miR-18a-5p                  |
| FZD4    | hsa-miR-7851-3p                                                |
| FZD5    | hsa-miR-155-5p                                                 |
| FZD6    | hsa-miR-96-5p                                                  |
| GNAO1   | hsa-miR-654-5p                                                 |
| GNB2    | hsa-miR-7851-3p                                                |
| GNB3    | hsa-miR-6763-5p                                                |
| GNB4    | hsa-miR-96-5p                                                  |
| GNB5    | hsa-miR-152-3p, hsa-miR-455-3p                                 |
| GNG12   | hsa-miR-96-5p                                                  |
| GNG2    | hsa-miR-181a-5p, hsa-miR-3132, hsa-miR-18a-5p                  |
| GNG3    | hsa-miR-654-5p                                                 |
| GNG7    | hsa-miR-492, hsa-miR-6763-5p                                   |
| GSK3B   | hsa-miR-18a-5p, hsa-miR-155-5p                                 |
| ITPR1   | hsa-miR-92b-3p, hsa-miR-96-5p                                  |
| ITPR2   | hsa-miR-3132, hsa-miR-96-5p                                    |
| KMT2D   | hsa-miR-1246                                                   |
| KRAS    | hsa-miR-96-5p, hsa-miR-501-3p, hsa-miR-7851-3p, hsa-miR-155-5p |
| KREMEN1 | hsa-miR-3135b                                                  |
| KREMEN2 | hsa-miR-455-3p, hsa-miR-3135b                                  |
| LRP6    | hsa-miR-96-5p, hsa-miR-455-3p, hsa-miR-7-5p                    |
| MEN1    | hsa-miR-3135b                                                  |
| NFATC1  | hsa-miR-3135b                                                  |
| NLK     | hsa-miR-92b-3p, hsa-miR-181a-5p                                |
| PDE6B   | hsa-miR-7851-3p                                                |
| PDE6G   | hsa-miR-654-5p                                                 |
| PFN1    | hsa-miR-6763-5p, hsa-miR-96-5p                                 |
| PIP5K1B | hsa-miR-205-3p                                                 |
| PLCB1   | hsa-miR-205-3p, hsa-miR-378a-3p, hsa-miR-7-5p                  |
| PPP2CB  | hsa-miR-1246, hsa-miR-155-5p                                   |
| PPP2R1B | hsa-miR-7-5p                                                   |
| PPP2R5D | hsa-miR-6763-5p                                                |
| PPP2R5E | hsa-miR-501-3p                                                 |
| PPP3CA  | hsa-miR-501-3p                                                 |
| PPP3R1  | hsa-miR-181a-5p, hsa-miR-96-5p                                 |
| PRKACA  | hsa-miR-6763-5p                                                |
| PRKCB   | hsa-miR-7-5p                                                   |
| PSMA1   | hsa-miR-205-3p                                                 |
| PSMA5   | hsa-miR-1246, hsa-miR-378a-3p                                  |
| PSMB5   | hsa-miR-663b                                                   |
| PSMC2   | hsa-miR-378a-3p                                                |
| PSMD10  | hsa-miR-205-3p                                                 |
| PSMD11  | hsa-miR-3135b, hsa-miR-501-3p                                  |
| PSMD8   | hsa-miR-455-3p                                                 |
| PSMD9   | hsa-miR-654-5p, hsa-miR-152-3p                                 |
| PSME3   | hsa-miR-7-5p                                                   |
| PSME4   | hsa-miR-492                                                    |
| PYGO2   | hsa-miR-96-5p, hsa-miR-3132, hsa-miR-3135b                     |
| RAC1    | hsa-miR-96-5p, hsa-miR-155-5p                                  |
| RBBP5   | hsa-miR-205-3p, hsa-miR-3135b                                  |
| RHOA    | hsa-miR-3135b                                                  |
| RNF146  | hsa-miR-155-5p                                                 |
| RSPO4   | hsa-miR-205-3p, hsa-miR-654-5p                                 |
| RYK     | hsa-miR-96-5p, hsa-miR-7-5p                                    |
| SCG2    | hsa-miR-155-5p                                                 |
| SMARCA4 | hsa-miR-155-5p                                                 |
| SMURF1  | hsa-miR-92b-3p                                                 |
| SNX3    | hsa-miR-3135b                                                  |
| SOST    | hsa-miR-378a-3p                                                |
| SOX2    | hsa-miR-1246                                                   |

|        |                                                                                                            |
|--------|------------------------------------------------------------------------------------------------------------|
| SOX4   | hsa-miR-92b-3p                                                                                             |
| SOX6   | hsa-miR-96-5p, hsa-miR-3135b, hsa-miR-378a-3p, hsa-miR-3132, hsa-miR-181a-5p, hsa-miR-455-3p, hsa-miR-7-5p |
| SOX9   | hsa-miR-155-5p                                                                                             |
| TCF4   | hsa-miR-152-3p, hsa-miR-205-3p, hsa-miR-92b-3p, hsa-miR-7-5p, hsa-miR-155-5p                               |
| TCF7L2 | hsa-miR-654-5p, hsa-miR-155-5p, hsa-miR-181a-5p, hsa-miR-96-5p                                             |
| TLE1   | hsa-miR-92b-3p                                                                                             |
| TLE4   | hsa-miR-155-5p                                                                                             |
| TMED5  | hsa-miR-92b-3p, hsa-miR-3132, hsa-miR-205-3p                                                               |
| TNKS   | hsa-miR-205-3p                                                                                             |
| TNKS2  | hsa-miR-205-3p, hsa-miR-96-5p                                                                              |
| TNRC6A | hsa-miR-152-3p, hsa-miR-654-5p, hsa-miR-96-5p, hsa-miR-7-5p                                                |
| TNRC6B | hsa-miR-18a-5p, hsa-miR-7-5p, hsa-miR-92b-3p                                                               |
| TNRC6C | hsa-miR-152-3p                                                                                             |
| VPS26A | hsa-miR-96-5p                                                                                              |
| WIF1   | hsa-miR-181a-5p                                                                                            |
| WLS    | hsa-miR-3132                                                                                               |
| WNT10A | hsa-miR-378a-3p                                                                                            |
| WNT10B | hsa-miR-152-3p                                                                                             |
| WNT4   | hsa-miR-654-5p, hsa-miR-3135b                                                                              |
| WNT5B  | hsa-miR-8071                                                                                               |
| WNT6   | hsa-miR-654-5p                                                                                             |
| XIAP   | hsa-miR-96-5p, hsa-miR-205-3p, hsa-miR-455-3p                                                              |
| XPO1   | hsa-miR-205-3p, hsa-miR-455-3p                                                                             |
| ZNRF3  | hsa-miR-155-5p                                                                                             |

### Supplementary Figure S1

Unsupervised hierarchical clustering heatmap including all expressed miRNAs (n = 1031). p16/HPV DNA status, p16<sup>INK4A</sup> status and tumour localisation is indicated on a case-by-case basis. Heat map colours indicate mRNA expression z-scores on a scale of -6 to 6.

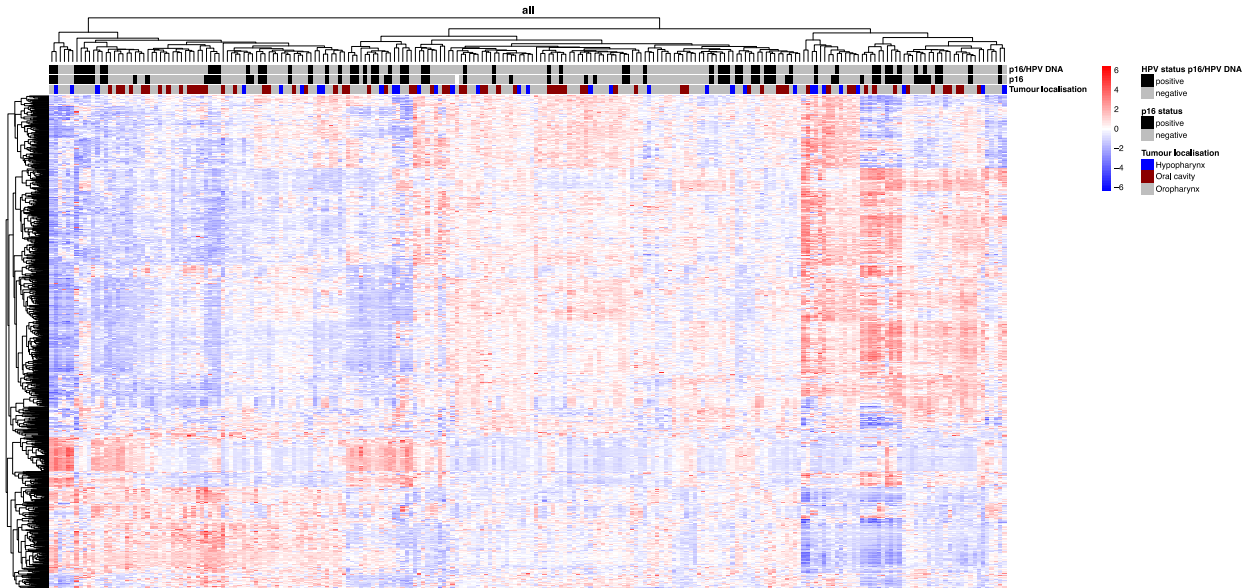

## Supplementary Figure S2

Heatmap differentially expressed miRNAs (n = 55; adjusted p-value < 0.05 and  $|\log_2 \text{fold change}| > 0.5$ ) in HPV-positive (n = 61) versus HPV-negative (n = 168) HNSCC (p16/HPV DNA status). Heat map colours indicate mRNA expression z-scores on a scale of -5 to 5.

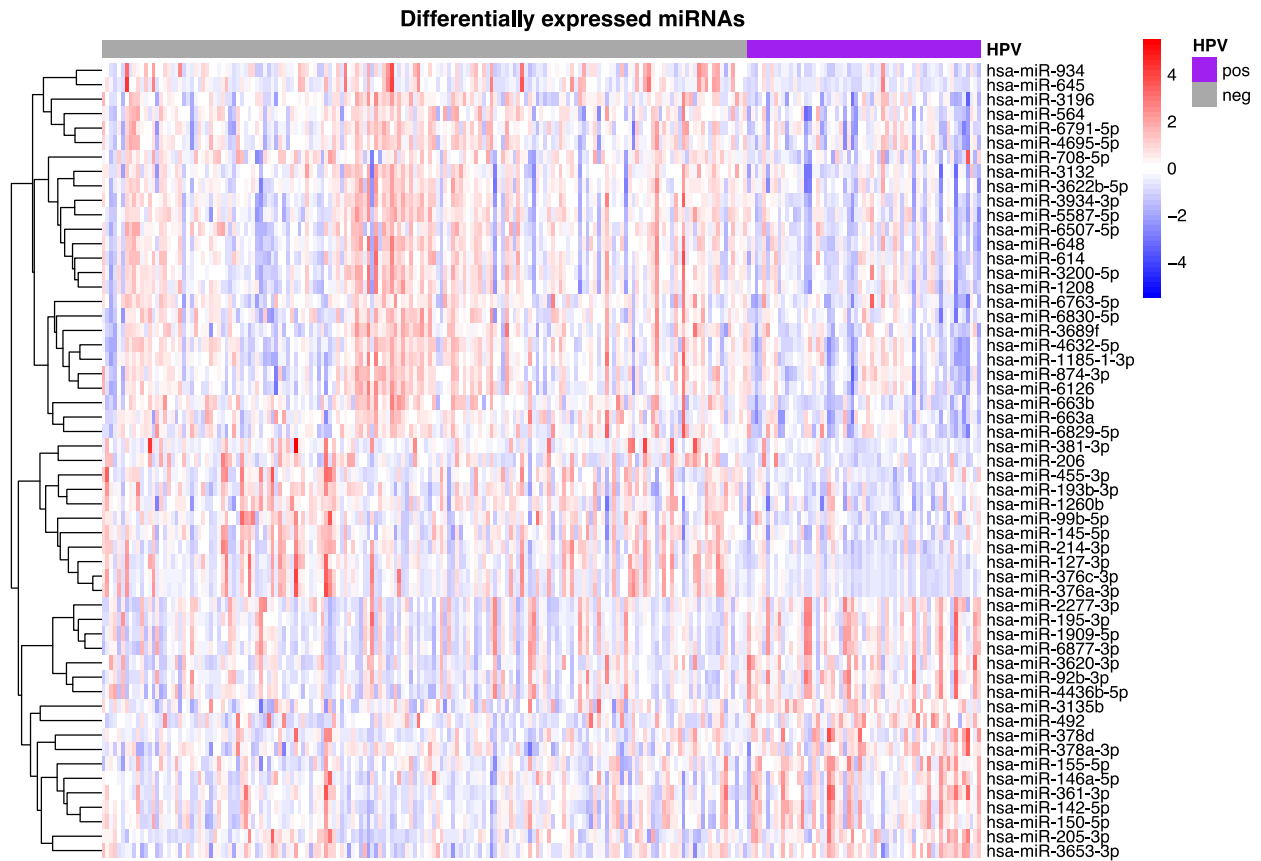

### Supplementary Figure S3

Kaplan–Meier curves for the endpoint overall survival according to the 24-miRNA signature predicted HPV-status in **(A)** p16/HPV DNA-positive and **(B)** p16/HPV DNA-negative patients. *P*-values are derived by log-rank test. Hazard ratios (HR) with 95% confidence intervals (CI) are given.

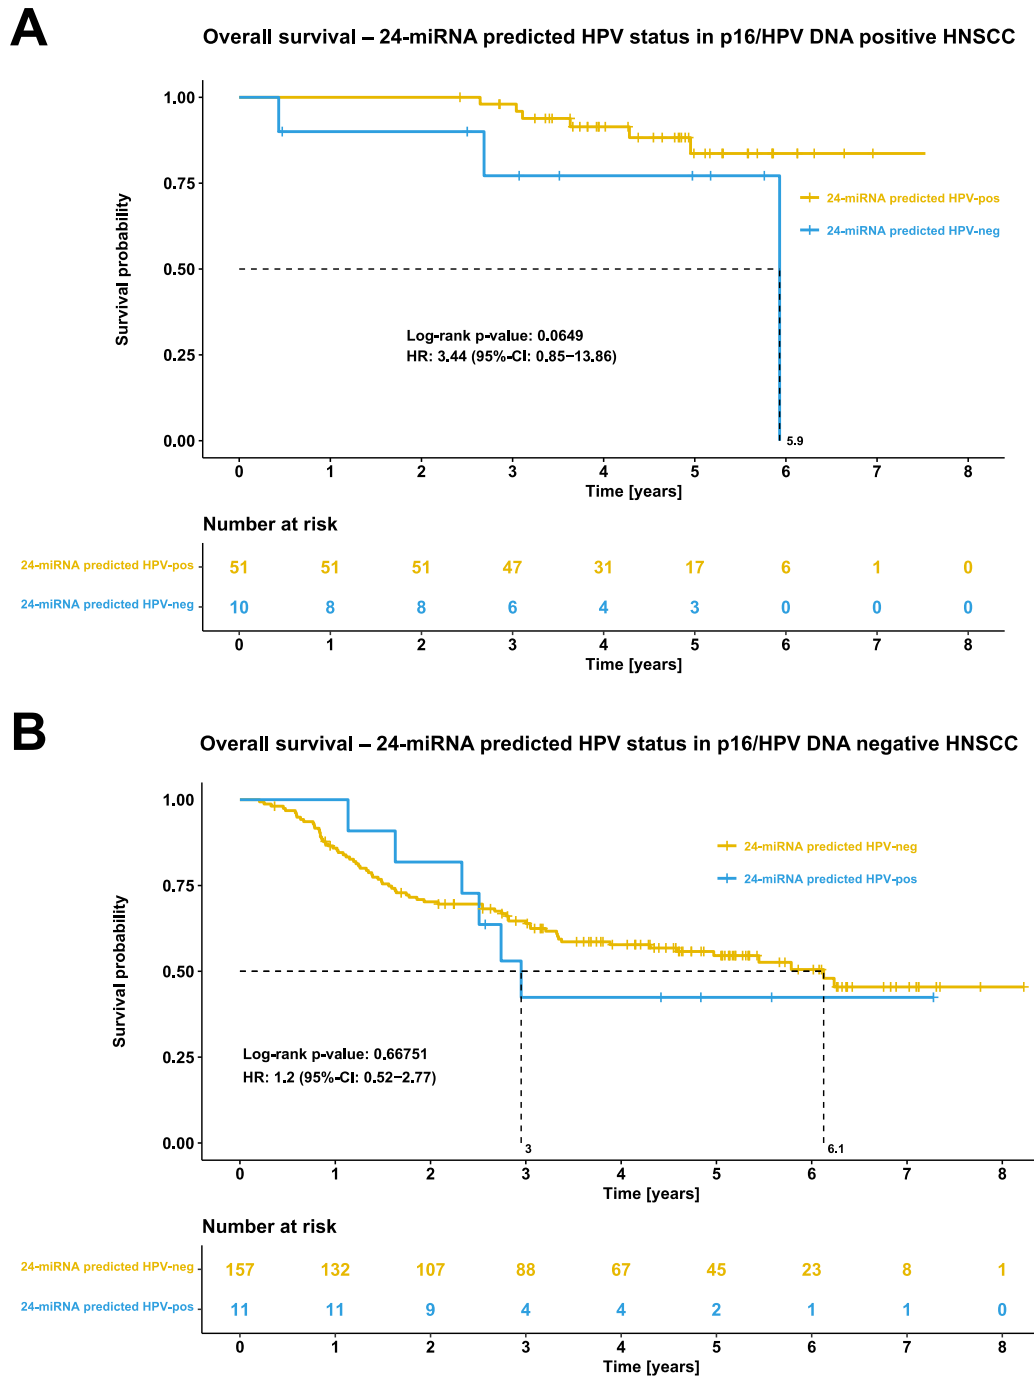

## Supplementary Figure S4

Significantly enriched KEGG pathways (adjusted  $p$ -values  $< 0.05$ ) of the top 1000 miRNA-mRNA interactions in 24-miRNA-positive/HPV-associated (left) and 24-miRNA-negative/HPV-negative (right) HNSCC: **(A)** Enrichment dot plots of the top 25 KEGG pathways with the highest gene ratios (i.e., the percentage of genes in the given KEGG pathway) and **(B)** enrichment maps. Information on gene count/size (i.e., the number of genes enriched in a KEGG pathway) is given. Overlapping significantly enriched pathways in HPV-positive and HPV-negative HNSCC are written in bold. Significantly enriched KEGG pathways occurring exclusively in 24-miRNA-positive/HPV-associated (left) or 24-miRNA-negative/HPV-negative (right) tumours are underlined (bold blue).

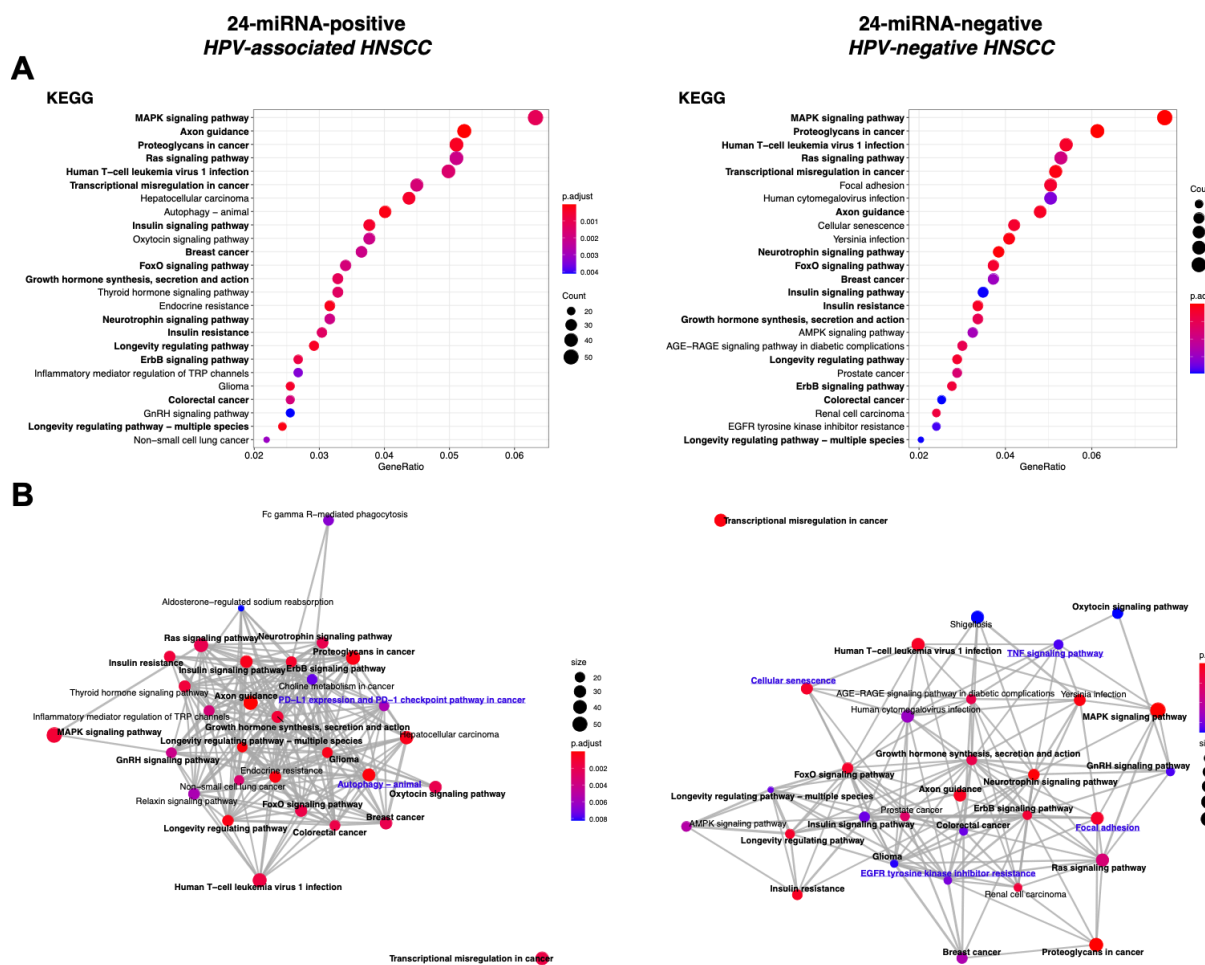

Supplement: s1 [file s1]
